# Supplementary material
Source: publisher figshare collection journal article supplement (https://acs.figshare.com/ndownloader/files/4266199)
Supplement: Supplementary file 1 [file 4266199]

 
data_1 
 
_audit_creation_method            SHELXL-97 
_chemical_name_systematic 
; 
 ? 
; 
_chemical_name_common             ? 
_chemical_melting_point           ? 
_chemical_formula_moiety           
 'C4 H8 O2' 
_chemical_formula_sum 
 'C4 H8 O2' 
_chemical_formula_weight          88.10 
 
loop_ 
 _atom_type_symbol 
 _atom_type_description 
 _atom_type_scat_dispersion_real 
 _atom_type_scat_dispersion_imag 
 _atom_type_scat_source 
 'C'  'C'   0.0033   0.0016 
 'International Tables Vol C Tables 4.2.6.8 and 6.1.1.4' 
 'H'  'H'   0.0000   0.0000 
 'International Tables Vol C Tables 4.2.6.8 and 6.1.1.4' 
 'O'  'O'   0.0106   0.0060 
 'International Tables Vol C Tables 4.2.6.8 and 6.1.1.4' 
 
_symmetry_cell_setting            Triclinic 
_symmetry_space_group_name_H-M    'P - 1' 
_space_group_name_Hall            '-P 1' 
loop_ 
 _symmetry_equiv_pos_as_xyz 
 'x, y, z' 
 '-x, -y, -z' 
 
_cell_length_a                    7.0940(8) 
_cell_length_b                    7.6307(8) 
_cell_length_c                    10.9005(12) 
_cell_angle_alpha                 70.738(2) 
_cell_angle_beta                  83.647(2) 
_cell_angle_gamma                 65.339(2) 
_cell_volume                      505.98(10) 
_cell_formula_units_Z             4 
_cell_measurement_temperature     100(2) 
_cell_measurement_reflns_used     2373 
_cell_measurement_theta_min       3.16   
_cell_measurement_theta_max       30.59 
 
_exptl_crystal_description        cylinder 
_exptl_crystal_colour             colorless 
_exptl_crystal_size_max           ? 
_exptl_crystal_size_mid           0.3 
_exptl_crystal_size_min           0.3 
_exptl_crystal_density_meas       'not measured' 
_exptl_crystal_density_diffrn     1.157 
_exptl_crystal_density_method     'not measured' 
_exptl_crystal_F_000              192 
_exptl_absorpt_coefficient_mu     0.092 
_exptl_absorpt_correction_type    'multi-scan' 
_exptl_absorpt_correction_T_min   0.9139 
_exptl_absorpt_correction_T_max   1.0000 
_exptl_absorpt_process_details    'SADABS (Sheldrick, 2003)' 
 
_exptl_special_details 
; 
data collection in omega at 0.5\%                    
scan width two run with 364 frames each.
Run 1 : phi=0\%, chi=0\% 
Run 2 : phi=8\%, chi=0\%
 
; 
 
_diffrn_ambient_temperature       100(2) 
_diffrn_radiation_wavelength      0.71073 
_diffrn_radiation_type            MoK\a 
_diffrn_radiation_source          'fine-focus sealed tube' 
_diffrn_radiation_monochromator   graphite 
_diffrn_measurement_device_type   'Bruker SMART APEX II CCD area detector'
_diffrn_measurement_method        'phi and omega scan'
_diffrn_detector_area_resol_mean  ? 
_diffrn_standards_number          ? 
_diffrn_standards_interval_count  ? 
_diffrn_standards_interval_time   ? 
_diffrn_standards_decay_%         ? 
_diffrn_reflns_number             2928 
_diffrn_reflns_av_R_equivalents   0.0102 
_diffrn_reflns_av_sigmaI/netI     0.0159 
_diffrn_reflns_limit_h_min        -2 
_diffrn_reflns_limit_h_max        8 
_diffrn_reflns_limit_k_min        -4 
_diffrn_reflns_limit_k_max        8 
_diffrn_reflns_limit_l_min        -13 
_diffrn_reflns_limit_l_max        13 
_diffrn_reflns_theta_min          1.98 
_diffrn_reflns_theta_max          25.99 
_reflns_number_total              1508 
_reflns_number_gt                 1371 
_reflns_threshold_expression      'I>2\s(I)'
 
_computing_data_collection        'APEX2  (Bruker, 2005)' 
_computing_cell_refinement        'SAINT+ ver. 6.2 (Bruker, 2001)' 
_computing_data_reduction         'SAINT+ ver. 6.2 (Bruker, 2001)' 
_computing_structure_solution     'SHELXTL ver. 6.12 (Sheldrick, 2001)' 
_computing_structure_refinement   'SHELXTL ver. 6.12 (Sheldrick, 2001)' 
_computing_molecular_graphics     'SHELXTL ver. 6.12 (Sheldrick, 2001)' 
_computing_publication_material   'SHELXTL ver. 6.12 (Sheldrick, 2001)' 

 
_refine_special_details 
; 
 Refinement of F^2^ against ALL reflections.  The weighted R-factor wR and 
 goodness of fit S are based on F^2^, conventional R-factors R are based 
 on F, with F set to zero for negative F^2^. The threshold expression of 
 F^2^ > 2sigma(F^2^) is used only for calculating R-factors(gt) etc. and is 
 not relevant to the choice of reflections for refinement.  R-factors based 
 on F^2^ are statistically about twice as large as those based on F, and R- 
 factors based on ALL data will be even larger. 
; 
 
_refine_ls_structure_factor_coef  Fsqd  
_refine_ls_matrix_type            full 
_refine_ls_weighting_scheme       calc  
_refine_ls_weighting_details 
 'calc w=1/[\s^2^(Fo^2^)+(0.0100P)^2^+0.3950P] where P=(Fo^2^+2Fc^2^)/3' 
_atom_sites_solution_primary      direct 
_atom_sites_solution_secondary    difmap 
_atom_sites_solution_hydrogens    geom 
_refine_ls_hydrogen_treatment     refall
_refine_ls_extinction_method      none 
_refine_ls_extinction_coef        ? 
_refine_ls_number_reflns          1508 
_refine_ls_number_parameters      173 
_refine_ls_number_restraints      0 
_refine_ls_R_factor_all           0.0372 
_refine_ls_R_factor_gt            0.0349 
_refine_ls_wR_factor_ref          0.0772 
_refine_ls_wR_factor_gt           0.0759 
_refine_ls_goodness_of_fit_ref    1.002 
_refine_ls_restrained_S_all       1.002 
_refine_ls_shift/su_max           0.000 
_refine_ls_shift/su_mean          0.000 
 
loop_ 
 _atom_site_label 
 _atom_site_type_symbol 
 _atom_site_fract_x 
 _atom_site_fract_y 
 _atom_site_fract_z 
 _atom_site_U_iso_or_equiv 
 _atom_site_adp_type 
 _atom_site_occupancy 
 _atom_site_symmetry_multiplicity 
 _atom_site_calc_flag 
 _atom_site_refinement_flags 
 _atom_site_disorder_assembly 
 _atom_site_disorder_group 
O1A O 0.1091(2) 0.2064(2) 0.04964(10) 0.0354(4) Uani 1 1 d . . . 
O2A O 0.02685(17) 0.23011(19) 0.25006(10) 0.0274(3) Uani 1 1 d . . . 
C1A C 0.0268(2) 0.1612(3) 0.15102(14) 0.0256(4) Uani 1 1 d . . . 
C2A C -0.0859(3) 0.0251(4) 0.18398(17) 0.0325(5) Uani 1 1 d . . . 
H2AA H -0.080(3) -0.032(3) 0.118(2) 0.051(6) Uiso 1 1 d . . . 
H2AB H -0.032(3) -0.085(4) 0.266(2) 0.062(7) Uiso 1 1 d . . . 
H2AC H -0.229(4) 0.100(4) 0.195(2) 0.067(7) Uiso 1 1 d . . . 
C3A C 0.1334(3) 0.3640(3) 0.22856(16) 0.0284(5) Uani 1 1 d . . . 
H3AA H 0.059(3) 0.487(3) 0.1558(17) 0.028(5) Uiso 1 1 d . . . 
H3AB H 0.279(3) 0.292(3) 0.2106(15) 0.023(4) Uiso 1 1 d . . . 
C4A C 0.1175(3) 0.4176(4) 0.35208(17) 0.0334(5) Uani 1 1 d . . . 
H4AA H 0.191(3) 0.502(3) 0.3439(17) 0.035(5) Uiso 1 1 d . . . 
H4AB H -0.031(3) 0.489(3) 0.3690(17) 0.033(5) Uiso 1 1 d . . . 
H4AC H 0.189(3) 0.290(3) 0.427(2) 0.042(5) Uiso 1 1 d . . . 
O1B O 0.5484(2) 0.9256(2) 0.35242(11) 0.0394(4) Uani 1 1 d . . . 
O2B O 0.42381(17) 0.73581(19) 0.29785(9) 0.0255(3) Uani 1 1 d . . . 
C1B C 0.4438(2) 0.8306(3) 0.37708(14) 0.0239(4) Uani 1 1 d . . . 
C2B C 0.3212(3) 0.7988(4) 0.49756(16) 0.0304(5) Uani 1 1 d . . . 
H2BA H 0.336(3) 0.869(4) 0.548(2) 0.058(7) Uiso 1 1 d . . . 
H2BB H 0.375(4) 0.656(4) 0.548(2) 0.062(7) Uiso 1 1 d . . . 
H2BC H 0.177(3) 0.839(3) 0.4756(18) 0.044(6) Uiso 1 1 d . . . 
C3B C 0.5408(3) 0.7546(3) 0.17856(15) 0.0275(5) Uani 1 1 d . . . 
H3BA H 0.485(3) 0.905(3) 0.1254(17) 0.026(5) Uiso 1 1 d . . . 
H3BB H 0.686(3) 0.707(3) 0.2023(16) 0.028(5) Uiso 1 1 d . . . 
C4B C 0.5059(3) 0.6300(4) 0.10903(18) 0.0382(6) Uani 1 1 d . . . 
H4BA H 0.559(3) 0.480(4) 0.166(2) 0.056(7) Uiso 1 1 d . . . 
H4BB H 0.589(3) 0.634(3) 0.030(2) 0.050(6) Uiso 1 1 d . . . 
H4BC H 0.356(3) 0.682(3) 0.0858(18) 0.044(6) Uiso 1 1 d . . . 
 
loop_ 
 _atom_site_aniso_label 
 _atom_site_aniso_U_11 
 _atom_site_aniso_U_22 
 _atom_site_aniso_U_33 
 _atom_site_aniso_U_23 
 _atom_site_aniso_U_13 
 _atom_site_aniso_U_12 
O1A 0.0483(7) 0.0393(11) 0.0236(6) -0.0119(6) 0.0118(5) -0.0235(7) 
O2A 0.0353(6) 0.0313(10) 0.0214(5) -0.0100(5) 0.0065(4) -0.0191(7) 
C1A 0.0262(8) 0.0249(14) 0.0225(7) -0.0076(7) 0.0013(6) -0.0074(9) 
C2A 0.0373(10) 0.0383(17) 0.0293(9) -0.0143(9) 0.0053(7) -0.0206(11) 
C3A 0.0347(10) 0.0270(15) 0.0259(8) -0.0069(8) 0.0040(7) -0.0164(10) 
C4A 0.0436(11) 0.0314(16) 0.0301(9) -0.0102(9) 0.0006(8) -0.0192(12) 
O1B 0.0512(8) 0.0540(12) 0.0349(6) -0.0245(6) 0.0153(6) -0.0373(8) 
O2B 0.0339(6) 0.0272(9) 0.0205(5) -0.0110(5) 0.0087(4) -0.0165(6) 
C1B 0.0276(8) 0.0220(14) 0.0209(7) -0.0076(7) 0.0011(6) -0.0084(9) 
C2B 0.0414(10) 0.0310(18) 0.0216(8) -0.0102(8) 0.0077(7) -0.0174(11) 
C3B 0.0306(9) 0.0317(16) 0.0216(7) -0.0116(8) 0.0092(6) -0.0137(10) 
C4B 0.0497(12) 0.0462(19) 0.0308(9) -0.0232(10) 0.0141(8) -0.0255(13) 
 
_geom_special_details 
; 
 All esds (except the esd in the dihedral angle between two l.s. planes) 
 are estimated using the full covariance matrix.  The cell esds are taken 
 into account individually in the estimation of esds in distances, angles 
 and torsion angles; correlations between esds in cell parameters are only 
 used when they are defined by crystal symmetry.  An approximate (isotropic) 
 treatment of cell esds is used for estimating esds involving l.s. planes. 
; 
 
loop_ 
 _geom_bond_atom_site_label_1 
 _geom_bond_atom_site_label_2 
 _geom_bond_distance 
 _geom_bond_site_symmetry_2 
 _geom_bond_publ_flag 
O1A C1A 1.2064(18) . ? 
O2A C1A 1.3481(19) . ? 
O2A C3A 1.4550(19) . ? 
C1A C2A 1.493(2) . ? 
C2A H2AA 0.94(2) . ? 
C2A H2AB 0.98(2) . ? 
C2A H2AC 0.95(3) . ? 
C3A C4A 1.511(2) . ? 
C3A H3AA 0.989(18) . ? 
C3A H3AB 0.979(18) . ? 
C4A H4AA 0.963(19) . ? 
C4A H4AB 0.992(19) . ? 
C4A H4AC 1.01(2) . ? 
O1B C1B 1.1942(19) . ? 
O2B C1B 1.3466(19) . ? 
O2B C3B 1.4620(17) . ? 
C1B C2B 1.501(2) . ? 
C2B H2BA 0.92(2) . ? 
C2B H2BB 0.97(3) . ? 
C2B H2BC 0.97(2) . ? 
C3B C4B 1.501(3) . ? 
C3B H3BA 1.02(2) . ? 
C3B H3BB 0.971(18) . ? 
C4B H4BA 1.03(2) . ? 
C4B H4BB 0.98(2) . ? 
C4B H4BC 1.00(2) . ? 
 
loop_ 
 _geom_angle_atom_site_label_1 
 _geom_angle_atom_site_label_2 
 _geom_angle_atom_site_label_3 
 _geom_angle 
 _geom_angle_site_symmetry_1 
 _geom_angle_site_symmetry_3 
 _geom_angle_publ_flag 
C1A O2A C3A 116.15(12) . . ? 
O1A C1A O2A 122.84(15) . . ? 
O1A C1A C2A 125.68(16) . . ? 
O2A C1A C2A 111.48(13) . . ? 
C1A C2A H2AA 112.7(13) . . ? 
C1A C2A H2AB 111.1(13) . . ? 
H2AA C2A H2AB 109.0(19) . . ? 
C1A C2A H2AC 110.2(15) . . ? 
H2AA C2A H2AC 106.5(18) . . ? 
H2AB C2A H2AC 107.1(19) . . ? 
O2A C3A C4A 106.81(13) . . ? 
O2A C3A H3AA 107.4(10) . . ? 
C4A C3A H3AA 110.2(11) . . ? 
O2A C3A H3AB 108.8(11) . . ? 
C4A C3A H3AB 110.6(10) . . ? 
H3AA C3A H3AB 112.9(14) . . ? 
C3A C4A H4AA 109.9(11) . . ? 
C3A C4A H4AB 109.3(10) . . ? 
H4AA C4A H4AB 110.4(17) . . ? 
C3A C4A H4AC 109.7(12) . . ? 
H4AA C4A H4AC 105.8(15) . . ? 
H4AB C4A H4AC 111.8(15) . . ? 
C1B O2B C3B 115.69(12) . . ? 
O1B C1B O2B 122.92(13) . . ? 
O1B C1B C2B 125.58(15) . . ? 
O2B C1B C2B 111.50(14) . . ? 
C1B C2B H2BA 108.6(14) . . ? 
C1B C2B H2BB 110.1(14) . . ? 
H2BA C2B H2BB 108(2) . . ? 
C1B C2B H2BC 110.9(11) . . ? 
H2BA C2B H2BC 112.5(19) . . ? 
H2BB C2B H2BC 106.9(18) . . ? 
O2B C3B C4B 106.90(13) . . ? 
O2B C3B H3BA 107.5(10) . . ? 
C4B C3B H3BA 112.0(10) . . ? 
O2B C3B H3BB 108.3(10) . . ? 
C4B C3B H3BB 112.8(11) . . ? 
H3BA C3B H3BB 109.2(14) . . ? 
C3B C4B H4BA 110.4(12) . . ? 
C3B C4B H4BB 108.6(12) . . ? 
H4BA C4B H4BB 106.6(18) . . ? 
C3B C4B H4BC 111.0(12) . . ? 
H4BA C4B H4BC 109.6(17) . . ? 
H4BB C4B H4BC 110.5(16) . . ? 
 
loop_ 
 _geom_torsion_atom_site_label_1 
 _geom_torsion_atom_site_label_2 
 _geom_torsion_atom_site_label_3 
 _geom_torsion_atom_site_label_4 
 _geom_torsion 
 _geom_torsion_site_symmetry_1 
 _geom_torsion_site_symmetry_2 
 _geom_torsion_site_symmetry_3 
 _geom_torsion_site_symmetry_4 
 _geom_torsion_publ_flag 
C3A O2A C1A O1A -0.1(2) . . . . ? 
C3A O2A C1A C2A 179.82(16) . . . . ? 
C1A O2A C3A C4A -178.79(16) . . . . ? 
C3B O2B C1B O1B 0.6(3) . . . . ? 
C3B O2B C1B C2B -178.91(16) . . . . ? 
C1B O2B C3B C4B 177.02(16) . . . . ? 
 
_diffrn_measured_fraction_theta_max    0.759 
_diffrn_reflns_theta_full              25.99 
_diffrn_measured_fraction_theta_full   0.759 
_refine_diff_density_max    0.170 
_refine_diff_density_min   -0.219 
_refine_diff_density_rms    0.046 


 
data_2 
 
_audit_creation_method            SHELXL-97 
_chemical_name_systematic 
; 
 ? 
; 
_chemical_name_common             ? 
_chemical_melting_point           ? 
_chemical_formula_moiety           
 'C5 H10 O3'
_chemical_formula_sum 
 'C5 H10 O3' 
_chemical_formula_weight          118.13 
 
loop_ 
 _atom_type_symbol 
 _atom_type_description 
 _atom_type_scat_dispersion_real 
 _atom_type_scat_dispersion_imag 
 _atom_type_scat_source 
 'C'  'C'   0.0033   0.0000 
 'International Tables Vol C Tables 4.2.6.8 and 6.1.1.4' 
 'H'  'H'   0.0000   0.0000 
 'International Tables Vol C Tables 4.2.6.8 and 6.1.1.4' 
 'O'  'O'   0.0106   0.0000 
 'International Tables Vol C Tables 4.2.6.8 and 6.1.1.4' 
 
_symmetry_cell_setting            Orthorhombic 
_symmetry_space_group_name_H-M    'P n a 21' 
_symmetry_space_group_name_Hall   'P 2c -2n '
loop_ 
 _symmetry_equiv_pos_as_xyz 
 'x, y, z' 
 '-x, -y, z+1/2' 
 'x+1/2, -y+1/2, z' 
 '-x+1/2, y+1/2, z+1/2' 
 
_cell_length_a                    20.9055(9) 
_cell_length_b                    13.4391(6) 
_cell_length_c                    9.3136(4) 
_cell_angle_alpha                 90.00 
_cell_angle_beta                  90.00 
_cell_angle_gamma                 90.00 
_cell_volume                      2616.7(2) 
_cell_formula_units_Z             16 
_cell_measurement_temperature     100(2) 
_cell_measurement_reflns_used     6128 
_cell_measurement_theta_min       2.47 
_cell_measurement_theta_max       28.67 
 
_exptl_crystal_description        cylinder 
_exptl_crystal_colour             colorless 
_exptl_crystal_size_max           ? 
_exptl_crystal_size_mid           0.30 
_exptl_crystal_size_min           0.30 
_exptl_crystal_density_meas       'not measured' 
_exptl_crystal_density_diffrn     1.199 
_exptl_crystal_density_method     'not measured' 
_exptl_crystal_F_000              1024 
_exptl_absorpt_coefficient_mu     0.099 
_exptl_absorpt_correction_type    'multi-scan' 
_exptl_absorpt_correction_T_min   0.9078 
_exptl_absorpt_correction_T_max   0.9710 
_exptl_absorpt_process_details    'SADABS (Sheldrick, 2003)' 

_exptl_special_details 
; 
data collection in omega at 0.5\%                    
scan width one run with 364 frames, phi=0\%, chi=0\% 
;

 
_diffrn_ambient_temperature       100(2) 
_diffrn_radiation_wavelength      0.71073 
_diffrn_radiation_type            MoK\a 
_diffrn_radiation_source          'fine-focus sealed tube' 
_diffrn_radiation_monochromator   graphite 
_diffrn_measurement_device_type   'Bruker SMART APEX II CCD area detector'
_diffrn_measurement_method        'omega scan'
_diffrn_detector_area_resol_mean  ? 
_diffrn_standards_number          ? 
_diffrn_standards_interval_count  ? 
_diffrn_standards_interval_time   ? 
_diffrn_standards_decay_%         ? 
_diffrn_reflns_number             17009 
_diffrn_reflns_av_R_equivalents   0.0257 
_diffrn_reflns_av_sigmaI/netI     0.0175 
_diffrn_reflns_limit_h_min        -24 
_diffrn_reflns_limit_h_max        27 
_diffrn_reflns_limit_k_min        -17 
_diffrn_reflns_limit_k_max        11 
_diffrn_reflns_limit_l_min        -6 
_diffrn_reflns_limit_l_max        10 
_diffrn_reflns_theta_min          2.66 
_diffrn_reflns_theta_max          28.00 
_reflns_number_total              3048 
_reflns_number_gt                 2831 
_reflns_threshold_expression      'I>2\s(I)'
 
_computing_data_collection        'APEX2  (Bruker, 2005)' 
_computing_cell_refinement        'SAINT+ ver. 6.2 (Bruker, 2001)' 
_computing_data_reduction         'SAINT+ ver. 6.2 (Bruker, 2001)' 
_computing_structure_solution     'SHELXTL ver. 6.12 (Sheldrick, 2001)' 
_computing_structure_refinement   'SHELXTL ver. 6.12 (Sheldrick, 2001)' 
_computing_molecular_graphics     'SHELXTL ver. 6.12 (Sheldrick, 2001)' 
_computing_publication_material   'SHELXTL ver. 6.12 (Sheldrick, 2001)' 

 
_refine_special_details 
; 
 Refinement of F^2^ against ALL reflections.  The weighted R-factor wR and 
 goodness of fit S are based on F^2^, conventional R-factors R are based 
 on F, with F set to zero for negative F^2^. The threshold expression of 
 F^2^ > 2sigma(F^2^) is used only for calculating R-factors(gt) etc. and is 
 not relevant to the choice of reflections for refinement.  R-factors based 
 on F^2^ are statistically about twice as large as those based on F, and R- 
 factors based on ALL data will be even larger. 
; 
 
_refine_ls_structure_factor_coef  Fsqd  
_refine_ls_matrix_type            full 
_refine_ls_weighting_scheme       calc  
_refine_ls_weighting_details 
 'calc w=1/[\s^2^(Fo^2^)+(0.0300P)^2^+0.2000P] where P=(Fo^2^+2Fc^2^)/3' 
_atom_sites_solution_primary      direct 
_atom_sites_solution_secondary    difmap 
_atom_sites_solution_hydrogens    geom 
_refine_ls_hydrogen_treatment     constr
_refine_ls_extinction_method      none 
_refine_ls_extinction_coef        ? 
_refine_ls_number_reflns          3048 
_refine_ls_number_parameters      298 
_refine_ls_number_restraints      1 
_refine_ls_R_factor_all           0.0282 
_refine_ls_R_factor_gt            0.0245 
_refine_ls_wR_factor_ref          0.0584 
_refine_ls_wR_factor_gt           0.0566 
_refine_ls_goodness_of_fit_ref    1.046 
_refine_ls_restrained_S_all       1.046 
_refine_ls_shift/su_max           0.000 
_refine_ls_shift/su_mean          0.000 
 
loop_ 
 _atom_site_label 
 _atom_site_type_symbol 
 _atom_site_fract_x 
 _atom_site_fract_y 
 _atom_site_fract_z 
 _atom_site_U_iso_or_equiv 
 _atom_site_adp_type 
 _atom_site_occupancy 
 _atom_site_symmetry_multiplicity 
 _atom_site_calc_flag 
 _atom_site_refinement_flags 
 _atom_site_disorder_assembly 
 _atom_site_disorder_group 
O1A O 0.35116(6) 0.95587(8) -0.08686(14) 0.0323(3) Uani 1 1 d . . . 
O2A O 0.43707(5) 0.99092(7) 0.05158(14) 0.0287(3) Uani 1 1 d . . . 
O3A O 0.34741(5) 0.96087(7) 0.15558(13) 0.0252(3) Uani 1 1 d . . . 
C1A C 0.37615(7) 0.96781(9) 0.0279(2) 0.0241(3) Uani 1 1 d . . . 
C2A C 0.47610(8) 0.99877(12) -0.0765(2) 0.0355(4) Uani 1 1 d . . . 
H2AA H 0.4585 1.0499 -0.1419 0.043 Uiso 1 1 calc R . . 
H2AB H 0.4772 0.9343 -0.1280 0.043 Uiso 1 1 calc R . . 
C3A C 0.54212(9) 1.02743(15) -0.0286(3) 0.0472(5) Uani 1 1 d . . . 
H3AA H 0.5706 1.0307 -0.1121 0.071 Uiso 1 1 calc R . . 
H3AB H 0.5583 0.9776 0.0392 0.071 Uiso 1 1 calc R . . 
H3AC H 0.5406 1.0926 0.0185 0.071 Uiso 1 1 calc R . . 
C4A C 0.27899(7) 0.94314(11) 0.1493(2) 0.0274(4) Uani 1 1 d . . . 
H4AA H 0.2701 0.8784 0.1027 0.033 Uiso 1 1 calc R . . 
H4AB H 0.2577 0.9962 0.0932 0.033 Uiso 1 1 calc R . . 
C5A C 0.25480(8) 0.94282(13) 0.3006(2) 0.0332(4) Uani 1 1 d . . . 
H5AA H 0.2085 0.9315 0.3006 0.050 Uiso 1 1 calc R . . 
H5AB H 0.2641 1.0071 0.3457 0.050 Uiso 1 1 calc R . . 
H5AC H 0.2760 0.8897 0.3547 0.050 Uiso 1 1 calc R . . 
O1B O 0.19575(5) 0.67899(8) 0.51857(14) 0.0313(3) Uani 1 1 d . . . 
O2B O 0.13169(5) 0.71999(7) 0.33216(13) 0.0254(3) Uani 1 1 d . . . 
O3B O 0.09439(5) 0.73349(7) 0.54704(13) 0.0264(3) Uani 1 1 d . . . 
C1B C 0.14575(7) 0.70787(10) 0.47068(19) 0.0231(3) Uani 1 1 d . . . 
C2B C 0.18122(7) 0.68891(11) 0.2319(2) 0.0280(4) Uani 1 1 d . . . 
H2BA H 0.1887 0.6164 0.2400 0.034 Uiso 1 1 calc R . . 
H2BB H 0.2218 0.7239 0.2530 0.034 Uiso 1 1 calc R . . 
C3B C 0.15836(7) 0.71455(13) 0.0840(2) 0.0321(4) Uani 1 1 d . . . 
H3BA H 0.1908 0.6950 0.0135 0.048 Uiso 1 1 calc R . . 
H3BB H 0.1509 0.7864 0.0776 0.048 Uiso 1 1 calc R . . 
H3BC H 0.1184 0.6790 0.0642 0.048 Uiso 1 1 calc R . . 
C4B C 0.10083(7) 0.72265(11) 0.70089(19) 0.0269(4) Uani 1 1 d . . . 
H4BA H 0.1365 0.7642 0.7369 0.032 Uiso 1 1 calc R . . 
H4BB H 0.1095 0.6524 0.7261 0.032 Uiso 1 1 calc R . . 
C5B C 0.03861(8) 0.75597(12) 0.7656(2) 0.0329(4) Uani 1 1 d . . . 
H5BA H 0.0406 0.7487 0.8702 0.049 Uiso 1 1 calc R . . 
H5BB H 0.0037 0.7150 0.7277 0.049 Uiso 1 1 calc R . . 
H5BC H 0.0310 0.8259 0.7411 0.049 Uiso 1 1 calc R . . 
O1C O 0.38074(5) 0.47286(9) 0.52491(15) 0.0326(3) Uani 1 1 d . . . 
O2C O 0.36496(5) 0.48223(7) 0.28499(13) 0.0248(2) Uani 1 1 d . . . 
O3C O 0.45954(5) 0.50843(7) 0.36570(13) 0.0250(2) Uani 1 1 d . . . 
C1C C 0.39976(7) 0.48645(9) 0.4046(2) 0.0225(3) Uani 1 1 d . . . 
C2C C 0.29687(7) 0.46396(10) 0.30608(19) 0.0240(3) Uani 1 1 d . . . 
H2CA H 0.2770 0.5202 0.3583 0.029 Uiso 1 1 calc R . . 
H2CB H 0.2903 0.4024 0.3625 0.029 Uiso 1 1 calc R . . 
C3C C 0.26776(7) 0.45345(11) 0.15969(19) 0.0263(3) Uani 1 1 d . . . 
H3CA H 0.2217 0.4418 0.1690 0.039 Uiso 1 1 calc R . . 
H3CB H 0.2875 0.3971 0.1097 0.039 Uiso 1 1 calc R . . 
H3CC H 0.2751 0.5146 0.1047 0.039 Uiso 1 1 calc R . . 
C4C C 0.50624(8) 0.50879(13) 0.4818(2) 0.0320(4) Uani 1 1 d . . . 
H4CA H 0.5048 0.4450 0.5349 0.038 Uiso 1 1 calc R . . 
H4CB H 0.4971 0.5636 0.5497 0.038 Uiso 1 1 calc R . . 
C5C C 0.57070(7) 0.52301(11) 0.4143(2) 0.0322(4) Uani 1 1 d . . . 
H5CA H 0.6038 0.5201 0.4887 0.048 Uiso 1 1 calc R . . 
H5CB H 0.5722 0.5879 0.3665 0.048 Uiso 1 1 calc R . . 
H5CC H 0.5782 0.4703 0.3436 0.048 Uiso 1 1 calc R . . 
O1D O -0.18568(5) 0.80885(8) -0.01110(14) 0.0317(3) Uani 1 1 d . . . 
O2D O -0.12174(4) 0.77244(7) -0.19993(13) 0.0243(2) Uani 1 1 d . . . 
O3D O -0.08296(5) 0.75909(7) 0.01340(13) 0.0248(3) Uani 1 1 d . . . 
C1D C -0.13559(7) 0.78266(10) -0.06092(19) 0.0234(4) Uani 1 1 d . . . 
C2D C -0.17285(7) 0.79733(12) -0.29893(19) 0.0286(4) Uani 1 1 d . . . 
H2DA H -0.1832 0.8691 -0.2927 0.034 Uiso 1 1 calc R . . 
H2DB H -0.2118 0.7587 -0.2760 0.034 Uiso 1 1 calc R . . 
C3D C -0.14931(7) 0.77185(12) -0.4462(2) 0.0321(4) Uani 1 1 d . . . 
H3DA H -0.1818 0.7902 -0.5173 0.048 Uiso 1 1 calc R . . 
H3DB H -0.1410 0.7002 -0.4520 0.048 Uiso 1 1 calc R . . 
H3DC H -0.1097 0.8085 -0.4659 0.048 Uiso 1 1 calc R . . 
C4D C -0.08708(7) 0.77382(11) 0.16747(19) 0.0268(4) Uani 1 1 d . . . 
H4DA H -0.1204 0.7302 0.2092 0.032 Uiso 1 1 calc R . . 
H4DB H -0.0979 0.8439 0.1896 0.032 Uiso 1 1 calc R . . 
C5D C -0.02246(8) 0.74778(12) 0.2274(2) 0.0324(4) Uani 1 1 d . . . 
H5DA H -0.0230 0.7558 0.3319 0.049 Uiso 1 1 calc R . . 
H5DB H 0.0099 0.7920 0.1858 0.049 Uiso 1 1 calc R . . 
H5DC H -0.0122 0.6786 0.2034 0.049 Uiso 1 1 calc R . . 
 
loop_ 
 _atom_site_aniso_label 
 _atom_site_aniso_U_11 
 _atom_site_aniso_U_22 
 _atom_site_aniso_U_33 
 _atom_site_aniso_U_23 
 _atom_site_aniso_U_13 
 _atom_site_aniso_U_12 
O1A 0.0404(6) 0.0370(6) 0.0196(8) -0.0001(5) -0.0007(6) 0.0080(5) 
O2A 0.0338(5) 0.0249(5) 0.0275(8) -0.0003(5) 0.0060(5) -0.0028(4) 
O3A 0.0306(6) 0.0271(5) 0.0180(7) 0.0023(4) -0.0005(5) 0.0001(4) 
C1A 0.0344(7) 0.0160(6) 0.0218(10) 0.0027(6) 0.0021(8) 0.0044(5) 
C2A 0.0431(9) 0.0297(7) 0.0336(12) 0.0003(7) 0.0159(8) 0.0010(6) 
C3A 0.0381(9) 0.0483(10) 0.0552(16) 0.0091(10) 0.0152(10) 0.0025(8) 
C4A 0.0279(7) 0.0317(7) 0.0226(11) 0.0019(7) -0.0005(7) 0.0028(6) 
C5A 0.0353(8) 0.0407(9) 0.0237(12) 0.0050(7) 0.0024(8) 0.0044(6) 
O1B 0.0257(5) 0.0385(6) 0.0296(8) 0.0014(5) -0.0051(5) 0.0026(4) 
O2B 0.0252(5) 0.0301(5) 0.0208(8) 0.0039(4) 0.0001(4) 0.0053(4) 
O3B 0.0279(5) 0.0308(5) 0.0205(8) 0.0027(5) -0.0002(5) 0.0038(4) 
C1B 0.0253(7) 0.0173(6) 0.0269(11) 0.0018(6) -0.0015(7) -0.0025(5) 
C2B 0.0250(7) 0.0294(7) 0.0297(11) 0.0026(7) 0.0037(7) 0.0040(6) 
C3B 0.0287(7) 0.0400(9) 0.0278(12) 0.0021(7) 0.0030(7) 0.0025(6) 
C4B 0.0331(8) 0.0251(7) 0.0225(12) 0.0002(6) -0.0023(7) -0.0002(6) 
C5B 0.0395(9) 0.0324(8) 0.0269(12) 0.0010(7) 0.0025(7) 0.0020(6) 
O1C 0.0351(6) 0.0458(6) 0.0169(8) 0.0028(5) -0.0009(6) -0.0037(4) 
O2C 0.0235(5) 0.0318(5) 0.0190(7) 0.0019(5) -0.0017(5) -0.0005(4) 
O3C 0.0261(5) 0.0280(5) 0.0209(7) 0.0021(4) -0.0040(5) -0.0006(4) 
C1C 0.0276(7) 0.0172(6) 0.0228(11) 0.0002(6) -0.0032(7) 0.0022(5) 
C2C 0.0228(7) 0.0266(6) 0.0225(10) 0.0019(6) 0.0020(7) 0.0002(5) 
C3C 0.0252(7) 0.0290(7) 0.0246(11) -0.0023(6) -0.0009(7) 0.0008(5) 
C4C 0.0311(8) 0.0385(8) 0.0265(12) 0.0018(7) -0.0105(7) -0.0005(6) 
C5C 0.0286(7) 0.0295(7) 0.0384(12) 0.0006(7) -0.0097(8) 0.0021(6) 
O1D 0.0240(5) 0.0383(6) 0.0327(8) -0.0056(5) 0.0031(5) 0.0029(4) 
O2D 0.0225(5) 0.0277(5) 0.0228(8) -0.0001(5) -0.0005(5) 0.0027(4) 
O3D 0.0250(5) 0.0274(5) 0.0219(8) -0.0016(5) -0.0006(4) 0.0028(4) 
C1D 0.0221(6) 0.0180(6) 0.0301(12) -0.0010(6) 0.0005(7) -0.0027(5) 
C2D 0.0232(7) 0.0324(8) 0.0301(12) -0.0033(7) -0.0056(7) 0.0043(6) 
C3D 0.0296(7) 0.0374(8) 0.0293(12) -0.0035(8) -0.0052(7) 0.0027(6) 
C4D 0.0325(8) 0.0257(7) 0.0223(12) -0.0039(6) 0.0018(7) -0.0022(6) 
C5D 0.0411(9) 0.0293(7) 0.0269(12) -0.0019(7) -0.0057(8) 0.0023(6) 
 
_geom_special_details 
; 
 All esds (except the esd in the dihedral angle between two l.s. planes) 
 are estimated using the full covariance matrix.  The cell esds are taken 
 into account individually in the estimation of esds in distances, angles 
 and torsion angles; correlations between esds in cell parameters are only 
 used when they are defined by crystal symmetry.  An approximate (isotropic) 
 treatment of cell esds is used for estimating esds involving l.s. planes. 
; 
 
loop_ 
 _geom_bond_atom_site_label_1 
 _geom_bond_atom_site_label_2 
 _geom_bond_distance 
 _geom_bond_site_symmetry_2 
 _geom_bond_publ_flag 
O1A C1A 1.201(2) . ? 
O2A C1A 1.3291(18) . ? 
O2A C2A 1.449(2) . ? 
O3A C1A 1.335(2) . ? 
O3A C4A 1.4514(17) . ? 
C2A C3A 1.501(3) . ? 
C2A H2AA 0.9900 . ? 
C2A H2AB 0.9900 . ? 
C3A H3AA 0.9800 . ? 
C3A H3AB 0.9800 . ? 
C3A H3AC 0.9800 . ? 
C4A C5A 1.498(3) . ? 
C4A H4AA 0.9900 . ? 
C4A H4AB 0.9900 . ? 
C5A H5AA 0.9800 . ? 
C5A H5AB 0.9800 . ? 
C5A H5AC 0.9800 . ? 
O1B C1B 1.2010(17) . ? 
O2B C1B 1.333(2) . ? 
O2B C2B 1.4554(19) . ? 
O3B C1B 1.3331(18) . ? 
O3B C4B 1.447(2) . ? 
C2B C3B 1.498(3) . ? 
C2B H2BA 0.9900 . ? 
C2B H2BB 0.9900 . ? 
C3B H3BA 0.9800 . ? 
C3B H3BB 0.9800 . ? 
C3B H3BC 0.9800 . ? 
C4B C5B 1.502(2) . ? 
C4B H4BA 0.9900 . ? 
C4B H4BB 0.9900 . ? 
C5B H5BA 0.9800 . ? 
C5B H5BB 0.9800 . ? 
C5B H5BC 0.9800 . ? 
O1C C1C 1.203(2) . ? 
O2C C1C 1.332(2) . ? 
O2C C2C 1.4579(17) . ? 
O3C C1C 1.3344(18) . ? 
O3C C4C 1.457(2) . ? 
C2C C3C 1.500(2) . ? 
C2C H2CA 0.9900 . ? 
C2C H2CB 0.9900 . ? 
C3C H3CA 0.9800 . ? 
C3C H3CB 0.9800 . ? 
C3C H3CC 0.9800 . ? 
C4C C5C 1.499(2) . ? 
C4C H4CA 0.9900 . ? 
C4C H4CB 0.9900 . ? 
C5C H5CA 0.9800 . ? 
C5C H5CB 0.9800 . ? 
C5C H5CC 0.9800 . ? 
O1D C1D 1.1981(18) . ? 
O2D C1D 1.334(2) . ? 
O2D C2D 1.4504(18) . ? 
O3D C1D 1.3380(18) . ? 
O3D C4D 1.451(2) . ? 
C2D C3D 1.497(3) . ? 
C2D H2DA 0.9900 . ? 
C2D H2DB 0.9900 . ? 
C3D H3DA 0.9800 . ? 
C3D H3DB 0.9800 . ? 
C3D H3DC 0.9800 . ? 
C4D C5D 1.503(2) . ? 
C4D H4DA 0.9900 . ? 
C4D H4DB 0.9900 . ? 
C5D H5DA 0.9800 . ? 
C5D H5DB 0.9800 . ? 
C5D H5DC 0.9800 . ? 
 
loop_ 
 _geom_angle_atom_site_label_1 
 _geom_angle_atom_site_label_2 
 _geom_angle_atom_site_label_3 
 _geom_angle 
 _geom_angle_site_symmetry_1 
 _geom_angle_site_symmetry_3 
 _geom_angle_publ_flag 
C1A O2A C2A 114.84(15) . . ? 
C1A O3A C4A 114.76(13) . . ? 
O1A C1A O2A 126.55(16) . . ? 
O1A C1A O3A 125.99(13) . . ? 
O2A C1A O3A 107.46(15) . . ? 
O2A C2A C3A 106.94(17) . . ? 
O2A C2A H2AA 110.3 . . ? 
C3A C2A H2AA 110.3 . . ? 
O2A C2A H2AB 110.3 . . ? 
C3A C2A H2AB 110.3 . . ? 
H2AA C2A H2AB 108.6 . . ? 
C2A C3A H3AA 109.5 . . ? 
C2A C3A H3AB 109.5 . . ? 
H3AA C3A H3AB 109.5 . . ? 
C2A C3A H3AC 109.5 . . ? 
H3AA C3A H3AC 109.5 . . ? 
H3AB C3A H3AC 109.5 . . ? 
O3A C4A C5A 107.16(14) . . ? 
O3A C4A H4AA 110.3 . . ? 
C5A C4A H4AA 110.3 . . ? 
O3A C4A H4AB 110.3 . . ? 
C5A C4A H4AB 110.3 . . ? 
H4AA C4A H4AB 108.5 . . ? 
C4A C5A H5AA 109.5 . . ? 
C4A C5A H5AB 109.5 . . ? 
H5AA C5A H5AB 109.5 . . ? 
C4A C5A H5AC 109.5 . . ? 
H5AA C5A H5AC 109.5 . . ? 
H5AB C5A H5AC 109.5 . . ? 
C1B O2B C2B 115.39(12) . . ? 
C1B O3B C4B 115.31(12) . . ? 
O1B C1B O3B 125.90(17) . . ? 
O1B C1B O2B 126.21(15) . . ? 
O3B C1B O2B 107.89(12) . . ? 
O2B C2B C3B 107.26(12) . . ? 
O2B C2B H2BA 110.3 . . ? 
C3B C2B H2BA 110.3 . . ? 
O2B C2B H2BB 110.3 . . ? 
C3B C2B H2BB 110.3 . . ? 
H2BA C2B H2BB 108.5 . . ? 
C2B C3B H3BA 109.5 . . ? 
C2B C3B H3BB 109.5 . . ? 
H3BA C3B H3BB 109.5 . . ? 
C2B C3B H3BC 109.5 . . ? 
H3BA C3B H3BC 109.5 . . ? 
H3BB C3B H3BC 109.5 . . ? 
O3B C4B C5B 106.67(13) . . ? 
O3B C4B H4BA 110.4 . . ? 
C5B C4B H4BA 110.4 . . ? 
O3B C4B H4BB 110.4 . . ? 
C5B C4B H4BB 110.4 . . ? 
H4BA C4B H4BB 108.6 . . ? 
C4B C5B H5BA 109.5 . . ? 
C4B C5B H5BB 109.5 . . ? 
H5BA C5B H5BB 109.5 . . ? 
C4B C5B H5BC 109.5 . . ? 
H5BA C5B H5BC 109.5 . . ? 
H5BB C5B H5BC 109.5 . . ? 
C1C O2C C2C 115.32(13) . . ? 
C1C O3C C4C 115.27(14) . . ? 
O1C C1C O2C 126.32(13) . . ? 
O1C C1C O3C 126.61(15) . . ? 
O2C C1C O3C 107.06(15) . . ? 
O2C C2C C3C 106.83(13) . . ? 
O2C C2C H2CA 110.4 . . ? 
C3C C2C H2CA 110.4 . . ? 
O2C C2C H2CB 110.4 . . ? 
C3C C2C H2CB 110.4 . . ? 
H2CA C2C H2CB 108.6 . . ? 
C2C C3C H3CA 109.5 . . ? 
C2C C3C H3CB 109.5 . . ? 
H3CA C3C H3CB 109.5 . . ? 
C2C C3C H3CC 109.5 . . ? 
H3CA C3C H3CC 109.5 . . ? 
H3CB C3C H3CC 109.5 . . ? 
O3C C4C C5C 106.98(15) . . ? 
O3C C4C H4CA 110.3 . . ? 
C5C C4C H4CA 110.3 . . ? 
O3C C4C H4CB 110.3 . . ? 
C5C C4C H4CB 110.3 . . ? 
H4CA C4C H4CB 108.6 . . ? 
C4C C5C H5CA 109.5 . . ? 
C4C C5C H5CB 109.5 . . ? 
H5CA C5C H5CB 109.5 . . ? 
C4C C5C H5CC 109.5 . . ? 
H5CA C5C H5CC 109.5 . . ? 
H5CB C5C H5CC 109.5 . . ? 
C1D O2D C2D 115.68(11) . . ? 
C1D O3D C4D 115.50(12) . . ? 
O1D C1D O2D 126.58(15) . . ? 
O1D C1D O3D 126.01(16) . . ? 
O2D C1D O3D 107.41(12) . . ? 
O2D C2D C3D 106.72(12) . . ? 
O2D C2D H2DA 110.4 . . ? 
C3D C2D H2DA 110.4 . . ? 
O2D C2D H2DB 110.4 . . ? 
C3D C2D H2DB 110.4 . . ? 
H2DA C2D H2DB 108.6 . . ? 
C2D C3D H3DA 109.5 . . ? 
C2D C3D H3DB 109.5 . . ? 
H3DA C3D H3DB 109.5 . . ? 
C2D C3D H3DC 109.5 . . ? 
H3DA C3D H3DC 109.5 . . ? 
H3DB C3D H3DC 109.5 . . ? 
O3D C4D C5D 106.38(13) . . ? 
O3D C4D H4DA 110.5 . . ? 
C5D C4D H4DA 110.5 . . ? 
O3D C4D H4DB 110.5 . . ? 
C5D C4D H4DB 110.5 . . ? 
H4DA C4D H4DB 108.6 . . ? 
C4D C5D H5DA 109.5 . . ? 
C4D C5D H5DB 109.5 . . ? 
H5DA C5D H5DB 109.5 . . ? 
C4D C5D H5DC 109.5 . . ? 
H5DA C5D H5DC 109.5 . . ? 
H5DB C5D H5DC 109.5 . . ? 
 
loop_ 
 _geom_torsion_atom_site_label_1 
 _geom_torsion_atom_site_label_2 
 _geom_torsion_atom_site_label_3 
 _geom_torsion_atom_site_label_4 
 _geom_torsion 
 _geom_torsion_site_symmetry_1 
 _geom_torsion_site_symmetry_2 
 _geom_torsion_site_symmetry_3 
 _geom_torsion_site_symmetry_4 
 _geom_torsion_publ_flag 
C2A O2A C1A O1A -2.05(19) . . . . ? 
C2A O2A C1A O3A 178.37(11) . . . . ? 
C4A O3A C1A O1A -3.93(19) . . . . ? 
C4A O3A C1A O2A 175.65(10) . . . . ? 
C1A O2A C2A C3A 178.68(12) . . . . ? 
C1A O3A C4A C5A -177.16(12) . . . . ? 
C4B O3B C1B O1B -1.3(2) . . . . ? 
C4B O3B C1B O2B 178.67(12) . . . . ? 
C2B O2B C1B O1B 4.0(2) . . . . ? 
C2B O2B C1B O3B -176.01(11) . . . . ? 
C1B O2B C2B C3B -176.31(12) . . . . ? 
C1B O3B C4B C5B 179.50(12) . . . . ? 
C2C O2C C1C O1C 3.13(19) . . . . ? 
C2C O2C C1C O3C -176.94(10) . . . . ? 
C4C O3C C1C O1C 4.5(2) . . . . ? 
C4C O3C C1C O2C -175.44(11) . . . . ? 
C1C O2C C2C C3C -175.35(11) . . . . ? 
C1C O3C C4C C5C 173.53(12) . . . . ? 
C2D O2D C1D O1D 1.0(2) . . . . ? 
C2D O2D C1D O3D -178.49(11) . . . . ? 
C4D O3D C1D O1D -4.43(19) . . . . ? 
C4D O3D C1D O2D 175.04(11) . . . . ? 
C1D O2D C2D C3D -174.92(12) . . . . ? 
C1D O3D C4D C5D -177.29(11) . . . . ? 
 
_diffrn_measured_fraction_theta_max    0.911 
_diffrn_reflns_theta_full              28.00 
_diffrn_measured_fraction_theta_full   0.911 
_refine_diff_density_max    0.135 
_refine_diff_density_min   -0.127 
_refine_diff_density_rms    0.026 

data_3 
 
_audit_creation_method            SHELXL-97 
_chemical_name_systematic 
; 
 ? 
; 
_chemical_name_common             ? 
_chemical_melting_point           ? 
_chemical_formula_moiety           
 'C8 H8 O2' 
_chemical_formula_sum 
 'C8 H8 O2' 
_chemical_formula_weight          136.14 
 
loop_ 
 _atom_type_symbol 
 _atom_type_description 
 _atom_type_scat_dispersion_real 
 _atom_type_scat_dispersion_imag 
 _atom_type_scat_source 
 'C'  'C'   0.0033   0.0016 
 'International Tables Vol C Tables 4.2.6.8 and 6.1.1.4' 
 'H'  'H'   0.0000   0.0000 
 'International Tables Vol C Tables 4.2.6.8 and 6.1.1.4' 
 'O'  'O'   0.0106   0.0060 
 'International Tables Vol C Tables 4.2.6.8 and 6.1.1.4' 
 
_symmetry_cell_setting            Orthorhombic 
_symmetry_space_group_name_H-M    'P b c a' 
_symmetry_space_group_name_Hall   '-P 2ac 2ab '
 
loop_ 
 _symmetry_equiv_pos_as_xyz 
 'x, y, z' 
 '-x+1/2, -y, z+1/2' 
 '-x, y+1/2, -z+1/2' 
 'x+1/2, -y+1/2, -z' 
 '-x, -y, -z' 
 'x-1/2, y, -z-1/2' 
 'x, -y-1/2, z-1/2' 
 '-x-1/2, y-1/2, z' 
 
_cell_length_a                    13.787(3) 
_cell_length_b                    5.9735(11) 
_cell_length_c                    16.925(3) 
_cell_angle_alpha                 90.00 
_cell_angle_beta                  90.00 
_cell_angle_gamma                 90.00 
_cell_volume                      1393.9(5) 
_cell_formula_units_Z             8 
_cell_measurement_temperature     100(2) 
_cell_measurement_reflns_used     3035 
_cell_measurement_theta_min       2.41 
_cell_measurement_theta_max       30.01 
 
_exptl_crystal_description        cylinder 
_exptl_crystal_colour             colorless 
_exptl_crystal_size_max           ?
_exptl_crystal_size_mid           0.30 
_exptl_crystal_size_min           0.30 
_exptl_crystal_density_meas       'not measured' 
_exptl_crystal_density_diffrn     1.297 
_exptl_crystal_density_method     'not measured' 
_exptl_crystal_F_000              576 
_exptl_absorpt_coefficient_mu     0.093 
_exptl_absorpt_correction_type    'multi-scan' 
_exptl_absorpt_correction_T_min   0.9128 
_exptl_absorpt_correction_T_max   0.9726 
_exptl_absorpt_process_details    'SADABS (Sheldrick, 2003)' 

_exptl_special_details 
; 
data collection in omega at 0.5\%                    
scan width one run with 364 frames, phi=0\%, chi=0\% 
;

 
_diffrn_ambient_temperature       100(2) 
_diffrn_radiation_wavelength      0.71073 
_diffrn_radiation_type            MoK\a 
_diffrn_radiation_source          'fine-focus sealed tube' 
_diffrn_radiation_monochromator   graphite 
_diffrn_measurement_device_type   'Bruker SMART APEX II CCD area detector'
_diffrn_measurement_method        'omega scan'
_diffrn_detector_area_resol_mean  ? 
_diffrn_standards_number          ? 
_diffrn_standards_interval_count  ? 
_diffrn_standards_interval_time   ? 
_diffrn_standards_decay_%         ? 
_diffrn_reflns_number             8421 
_diffrn_reflns_av_R_equivalents   0.0410 
_diffrn_reflns_av_sigmaI/netI     0.0286 
_diffrn_reflns_limit_h_min        -7 
_diffrn_reflns_limit_h_max        18 
_diffrn_reflns_limit_k_min        -4 
_diffrn_reflns_limit_k_max        4 
_diffrn_reflns_limit_l_min        -21 
_diffrn_reflns_limit_l_max        22 
_diffrn_reflns_theta_min          2.41 
_diffrn_reflns_theta_max          27.99 
_reflns_number_total              1270 
_reflns_number_gt                 1077 
_reflns_threshold_expression      'I>2\s(I)'
 
_computing_data_collection        'APEX2  (Bruker, 2005)' 
_computing_cell_refinement        'SAINT+ ver. 6.2 (Bruker, 2001)' 
_computing_data_reduction         'SAINT+ ver. 6.2 (Bruker, 2001)' 
_computing_structure_solution     'SHELXTL ver. 6.12 (Sheldrick, 2001)' 
_computing_structure_refinement   'SHELXTL ver. 6.12 (Sheldrick, 2001)' 
_computing_molecular_graphics     'SHELXTL ver. 6.12 (Sheldrick, 2001)' 
_computing_publication_material   'SHELXTL ver. 6.12 (Sheldrick, 2001)' 

 
_refine_special_details 
; 
 Refinement of F^2^ against ALL reflections.  The weighted R-factor wR and 
 goodness of fit S are based on F^2^, conventional R-factors R are based 
 on F, with F set to zero for negative F^2^. The threshold expression of 
 F^2^ > 2sigma(F^2^) is used only for calculating R-factors(gt) etc. and is 
 not relevant to the choice of reflections for refinement.  R-factors based 
 on F^2^ are statistically about twice as large as those based on F, and R- 
 factors based on ALL data will be even larger. 
; 
 
_refine_ls_structure_factor_coef  Fsqd  
_refine_ls_matrix_type            full 
_refine_ls_weighting_scheme       calc  
_refine_ls_weighting_details 
 'calc w=1/[\s^2^(Fo^2^)+(0.0300P)^2^+0.8000P] where P=(Fo^2^+2Fc^2^)/3' 
_atom_sites_solution_primary      direct 
_atom_sites_solution_secondary    difmap 
_atom_sites_solution_hydrogens    geom 
_refine_ls_hydrogen_treatment     constr 
_refine_ls_extinction_method      none 
_refine_ls_extinction_coef        ? 
_refine_ls_number_reflns          1270 
_refine_ls_number_parameters      92 
_refine_ls_number_restraints      0 
_refine_ls_R_factor_all           0.0446 
_refine_ls_R_factor_gt            0.0379 
_refine_ls_wR_factor_ref          0.0894 
_refine_ls_wR_factor_gt           0.0849 
_refine_ls_goodness_of_fit_ref    1.016 
_refine_ls_restrained_S_all       1.016 
_refine_ls_shift/su_max           0.000 
_refine_ls_shift/su_mean          0.000 
 
loop_ 
 _atom_site_label 
 _atom_site_type_symbol 
 _atom_site_fract_x 
 _atom_site_fract_y 
 _atom_site_fract_z 
 _atom_site_U_iso_or_equiv 
 _atom_site_adp_type 
 _atom_site_occupancy 
 _atom_site_symmetry_multiplicity 
 _atom_site_calc_flag 
 _atom_site_refinement_flags 
 _atom_site_disorder_assembly 
 _atom_site_disorder_group 
O1 O 0.37406(8) -0.1884(2) 0.43428(5) 0.0345(3) Uani 1 1 d . . . 
O2 O 0.37297(7) 0.1673(2) 0.39181(5) 0.0264(3) Uani 1 1 d . . . 
C1 C 0.37465(9) -0.0542(3) 0.38090(7) 0.0208(4) Uani 1 1 d . . . 
C2 C 0.37701(8) -0.1154(3) 0.29533(7) 0.0188(4) Uani 1 1 d . . . 
C3 C 0.37398(11) 0.2421(3) 0.47308(8) 0.0315(4) Uani 1 1 d . . . 
H3A H 0.3731 0.4061 0.4746 0.047 Uiso 1 1 calc R . . 
H3B H 0.4328 0.1872 0.4992 0.047 Uiso 1 1 calc R . . 
H3C H 0.3167 0.1837 0.5005 0.047 Uiso 1 1 calc R . . 
C4 C 0.34508(9) -0.3258(3) 0.27265(7) 0.0219(4) Uani 1 1 d . . . 
H4A H 0.3231 -0.4293 0.3113 0.026 Uiso 1 1 calc R . . 
C5 C 0.34519(9) -0.3849(3) 0.19325(8) 0.0246(4) Uani 1 1 d . . . 
H5A H 0.3211 -0.5270 0.1774 0.030 Uiso 1 1 calc R . . 
C6 C 0.38048(9) -0.2365(3) 0.13722(7) 0.0260(4) Uani 1 1 d . . . 
H6A H 0.3810 -0.2775 0.0830 0.031 Uiso 1 1 calc R . . 
C7 C 0.41510(10) -0.0281(3) 0.16023(7) 0.0254(4) Uani 1 1 d . . . 
H7A H 0.4410 0.0715 0.1219 0.031 Uiso 1 1 calc R . . 
C8 C 0.41196(9) 0.0352(3) 0.23917(7) 0.0206(4) Uani 1 1 d . . . 
H8A H 0.4334 0.1797 0.2548 0.025 Uiso 1 1 calc R . . 
 
loop_ 
 _atom_site_aniso_label 
 _atom_site_aniso_U_11 
 _atom_site_aniso_U_22 
 _atom_site_aniso_U_33 
 _atom_site_aniso_U_23 
 _atom_site_aniso_U_13 
 _atom_site_aniso_U_12 
O1 0.0563(7) 0.0263(10) 0.0209(5) 0.0040(5) 0.0007(4) 0.0002(5) 
O2 0.0392(5) 0.0195(11) 0.0205(5) -0.0024(4) -0.0015(4) 0.0008(5) 
C1 0.0204(6) 0.0199(15) 0.0222(6) -0.0005(6) -0.0005(4) 0.0003(6) 
C2 0.0169(5) 0.0197(12) 0.0197(5) 0.0001(5) -0.0017(4) 0.0025(5) 
C3 0.0457(8) 0.0267(13) 0.0222(6) -0.0058(6) -0.0029(6) 0.0037(7) 
C4 0.0192(5) 0.0211(12) 0.0253(6) 0.0022(6) -0.0002(4) 0.0002(6) 
C5 0.0228(6) 0.0215(12) 0.0297(7) -0.0058(6) -0.0043(5) 0.0008(6) 
C6 0.0267(6) 0.0308(13) 0.0205(6) -0.0036(6) -0.0023(5) 0.0049(6) 
C7 0.0270(6) 0.0279(13) 0.0213(6) 0.0045(6) 0.0010(5) 0.0008(6) 
C8 0.0212(6) 0.0167(11) 0.0240(6) 0.0011(6) -0.0014(4) -0.0002(5) 
 
_geom_special_details 
; 
 All esds (except the esd in the dihedral angle between two l.s. planes) 
 are estimated using the full covariance matrix.  The cell esds are taken 
 into account individually in the estimation of esds in distances, angles 
 and torsion angles; correlations between esds in cell parameters are only 
 used when they are defined by crystal symmetry.  An approximate (isotropic) 
 treatment of cell esds is used for estimating esds involving l.s. planes. 
; 
 
loop_ 
 _geom_bond_atom_site_label_1 
 _geom_bond_atom_site_label_2 
 _geom_bond_distance 
 _geom_bond_site_symmetry_2 
 _geom_bond_publ_flag 
O1 C1 1.2080(18) . ? 
O2 C1 1.336(2) . ? 
O2 C3 1.4463(16) . ? 
C1 C2 1.4942(17) . ? 
C2 C4 1.385(2) . ? 
C2 C8 1.395(2) . ? 
C3 H3A 0.9800 . ? 
C3 H3B 0.9800 . ? 
C3 H3C 0.9800 . ? 
C4 C5 1.3896(18) . ? 
C4 H4A 0.9500 . ? 
C5 C6 1.386(2) . ? 
C5 H5A 0.9500 . ? 
C6 C7 1.389(2) . ? 
C6 H6A 0.9500 . ? 
C7 C8 1.3890(18) . ? 
C7 H7A 0.9500 . ? 
C8 H8A 0.9500 . ? 
 
loop_ 
 _geom_angle_atom_site_label_1 
 _geom_angle_atom_site_label_2 
 _geom_angle_atom_site_label_3 
 _geom_angle 
 _geom_angle_site_symmetry_1 
 _geom_angle_site_symmetry_3 
 _geom_angle_publ_flag 
C1 O2 C3 115.93(12) . . ? 
O1 C1 O2 123.64(13) . . ? 
O1 C1 C2 124.22(17) . . ? 
O2 C1 C2 112.14(12) . . ? 
C4 C2 C8 120.39(12) . . ? 
C4 C2 C1 118.93(13) . . ? 
C8 C2 C1 120.67(14) . . ? 
O2 C3 H3A 109.5 . . ? 
O2 C3 H3B 109.5 . . ? 
H3A C3 H3B 109.5 . . ? 
O2 C3 H3C 109.5 . . ? 
H3A C3 H3C 109.5 . . ? 
H3B C3 H3C 109.5 . . ? 
C2 C4 C5 119.89(13) . . ? 
C2 C4 H4A 120.1 . . ? 
C5 C4 H4A 120.1 . . ? 
C6 C5 C4 119.95(15) . . ? 
C6 C5 H5A 120.0 . . ? 
C4 C5 H5A 120.0 . . ? 
C5 C6 C7 120.13(13) . . ? 
C5 C6 H6A 119.9 . . ? 
C7 C6 H6A 119.9 . . ? 
C8 C7 C6 120.18(14) . . ? 
C8 C7 H7A 119.9 . . ? 
C6 C7 H7A 119.9 . . ? 
C7 C8 C2 119.40(15) . . ? 
C7 C8 H8A 120.3 . . ? 
C2 C8 H8A 120.3 . . ? 
 
loop_ 
 _geom_torsion_atom_site_label_1 
 _geom_torsion_atom_site_label_2 
 _geom_torsion_atom_site_label_3 
 _geom_torsion_atom_site_label_4 
 _geom_torsion 
 _geom_torsion_site_symmetry_1 
 _geom_torsion_site_symmetry_2 
 _geom_torsion_site_symmetry_3 
 _geom_torsion_site_symmetry_4 
 _geom_torsion_publ_flag 
C3 O2 C1 O1 2.21(19) . . . . ? 
C3 O2 C1 C2 -177.96(11) . . . . ? 
O1 C1 C2 C4 22.42(19) . . . . ? 
O2 C1 C2 C4 -157.40(11) . . . . ? 
O1 C1 C2 C8 -156.73(13) . . . . ? 
O2 C1 C2 C8 23.45(16) . . . . ? 
C8 C2 C4 C5 -1.87(18) . . . . ? 
C1 C2 C4 C5 178.98(12) . . . . ? 
C2 C4 C5 C6 2.31(19) . . . . ? 
C4 C5 C6 C7 -0.5(2) . . . . ? 
C5 C6 C7 C8 -1.8(2) . . . . ? 
C6 C7 C8 C2 2.28(19) . . . . ? 
C4 C2 C8 C7 -0.42(18) . . . . ? 
C1 C2 C8 C7 178.72(12) . . . . ? 
 
_diffrn_measured_fraction_theta_max    0.756 
_diffrn_reflns_theta_full              27.99 
_diffrn_measured_fraction_theta_full   0.756 
_refine_diff_density_max    0.342 
_refine_diff_density_min   -0.204 
_refine_diff_density_rms    0.047 

data_4 
 
_audit_creation_method            SHELXL-97 
_chemical_name_systematic 
; 
 ? 
; 
_chemical_name_common             ? 
_chemical_melting_point           ? 
_chemical_formula_moiety          
 'C8 H8 O2' 
_chemical_formula_sum 
 'C8 H8 O2' 
_chemical_formula_weight          136.14 
 
loop_ 
 _atom_type_symbol 
 _atom_type_description 
 _atom_type_scat_dispersion_real 
 _atom_type_scat_dispersion_imag 
 _atom_type_scat_source 
 'C'  'C'   0.0033   0.0000 
 'International Tables Vol C Tables 4.2.6.8 and 6.1.1.4' 
 'H'  'H'   0.0000   0.0000 
 'International Tables Vol C Tables 4.2.6.8 and 6.1.1.4' 
 'O'  'O'   0.0106   0.0000 
 'International Tables Vol C Tables 4.2.6.8 and 6.1.1.4' 
 
_symmetry_cell_setting            Orthorhombic 
_symmetry_space_group_name_H-M    'P 21 21 21' 
_symmetry_space_group_name_Hall   'P 2ac 2ab'
 
loop_ 
 _symmetry_equiv_pos_as_xyz 
 'x, y, z' 
 '-x+1/2, -y, z+1/2' 
 '-x, y+1/2, -z+1/2' 
 'x+1/2, -y+1/2, -z' 
 
_cell_length_a                    5.8124(4) 
_cell_length_b                    7.5320(5) 
_cell_length_c                    16.6550(11) 
_cell_angle_alpha                 90.00 
_cell_angle_beta                  90.00 
_cell_angle_gamma                 90.00 
_cell_volume                      729.14(8) 
_cell_formula_units_Z             4 
_cell_measurement_temperature     100(2) 
_cell_measurement_reflns_used     3392 
_cell_measurement_theta_min       2.45 
_cell_measurement_theta_max       30.18 
 
_exptl_crystal_description        cylinder 
_exptl_crystal_colour             colorless 
_exptl_crystal_size_max           ? 
_exptl_crystal_size_mid           0.30 
_exptl_crystal_size_min           0.30 
_exptl_crystal_density_meas       'not measured'
_exptl_crystal_density_diffrn     1.240 
_exptl_crystal_density_method     'not measured' 
_exptl_crystal_F_000              288 
_exptl_absorpt_coefficient_mu     0.089 
_exptl_absorpt_correction_type    'multi-scan' 
_exptl_absorpt_correction_T_min   0.9164 
_exptl_absorpt_correction_T_max   0.9738 
_exptl_absorpt_process_details    'SADABS (Sheldrick, 2003)' 

_exptl_special_details 
; 
data collection in omega at 0.5\%                    
scan width one run with 364 frames, phi=0\%, chi=0\% 
;

 
_diffrn_ambient_temperature       100(2) 
_diffrn_radiation_wavelength      0.71073 
_diffrn_radiation_type            MoK\a 
_diffrn_radiation_source          'fine-focus sealed tube' 
_diffrn_radiation_monochromator   graphite 
_diffrn_measurement_device_type   'Bruker SMART APEX II CCD area detector'
_diffrn_measurement_method        'omega scan'
_diffrn_detector_area_resol_mean  ? 
_diffrn_standards_number          ? 
_diffrn_standards_interval_count  ? 
_diffrn_standards_interval_time   ? 
_diffrn_standards_decay_%         ? 
_diffrn_reflns_number             4845 
_diffrn_reflns_av_R_equivalents   0.0151 
_diffrn_reflns_av_sigmaI/netI     0.0096 
_diffrn_reflns_limit_h_min        -4 
_diffrn_reflns_limit_h_max        4 
_diffrn_reflns_limit_k_min        -9 
_diffrn_reflns_limit_k_max        4 
_diffrn_reflns_limit_l_min        -20 
_diffrn_reflns_limit_l_max        22 
_diffrn_reflns_theta_min          2.45 
_diffrn_reflns_theta_max          28.00 
_reflns_number_total              808 
_reflns_number_gt                 783 
_reflns_threshold_expression      'I>2\s(I)'
 
_computing_data_collection        'APEX2  (Bruker, 2005)' 
_computing_cell_refinement        'SAINT+ ver. 6.2 (Bruker, 2001)' 
_computing_data_reduction         'SAINT+ ver. 6.2 (Bruker, 2001)' 
_computing_structure_solution     'SHELXTL ver. 6.12 (Sheldrick, 2001)' 
_computing_structure_refinement   'SHELXTL ver. 6.12 (Sheldrick, 2001)' 
_computing_molecular_graphics     'SHELXTL ver. 6.12 (Sheldrick, 2001)' 
_computing_publication_material   'SHELXTL ver. 6.12 (Sheldrick, 2001)' 

 
_refine_special_details 
; 
 Refinement of F^2^ against ALL reflections.  The weighted R-factor wR and 
 goodness of fit S are based on F^2^, conventional R-factors R are based 
 on F, with F set to zero for negative F^2^. The threshold expression of 
 F^2^ > 2sigma(F^2^) is used only for calculating R-factors(gt) etc. and is 
 not relevant to the choice of reflections for refinement.  R-factors based 
 on F^2^ are statistically about twice as large as those based on F, and R- 
 factors based on ALL data will be even larger. 
; 
 
_refine_ls_structure_factor_coef  Fsqd  
_refine_ls_matrix_type            full 
_refine_ls_weighting_scheme       calc  
_refine_ls_weighting_details 
 'calc w=1/[\s^2^(Fo^2^)+(0.0300P)^2^+0.2000P] where P=(Fo^2^+2Fc^2^)/3' 
_atom_sites_solution_primary      direct 
_atom_sites_solution_secondary    difmap 
_atom_sites_solution_hydrogens    geom 
_refine_ls_hydrogen_treatment     constr
_refine_ls_extinction_method      none 
_refine_ls_extinction_coef        ? 
_refine_ls_number_reflns          808 
_refine_ls_number_parameters      93 
_refine_ls_number_restraints      0 
_refine_ls_R_factor_all           0.0272 
_refine_ls_R_factor_gt            0.0264 
_refine_ls_wR_factor_ref          0.0647 
_refine_ls_wR_factor_gt           0.0640 
_refine_ls_goodness_of_fit_ref    1.038 
_refine_ls_restrained_S_all       1.038 
_refine_ls_shift/su_max           0.000 
_refine_ls_shift/su_mean          0.000 
 
loop_ 
 _atom_site_label 
 _atom_site_type_symbol 
 _atom_site_fract_x 
 _atom_site_fract_y 
 _atom_site_fract_z 
 _atom_site_U_iso_or_equiv 
 _atom_site_adp_type 
 _atom_site_occupancy 
 _atom_site_symmetry_multiplicity 
 _atom_site_calc_flag 
 _atom_site_refinement_flags 
 _atom_site_disorder_assembly 
 _atom_site_disorder_group 
O1 O -0.1819(3) -0.37436(15) -0.44529(6) 0.0312(4) Uani 1 1 d . . . 
O2 O 0.0735(3) -0.57887(15) -0.48763(6) 0.0271(4) Uani 1 1 d . . . 
C1 C -0.0843(3) -0.44739(19) -0.49916(8) 0.0219(4) Uani 1 1 d . . . 
C2 C -0.1155(4) -0.4106(2) -0.58701(8) 0.0277(5) Uani 1 1 d . . . 
H2A H -0.2394 -0.3239 -0.5943 0.041 Uiso 1 1 calc R . . 
H2B H -0.1552 -0.5210 -0.6149 0.041 Uiso 1 1 calc R . . 
H2C H 0.0279 -0.3628 -0.6092 0.041 Uiso 1 1 calc R . . 
C3 C 0.1150(4) -0.63322(19) -0.40773(8) 0.0211(4) Uani 1 1 d . . . 
C4 C -0.0480(4) -0.7345(2) -0.36835(9) 0.0243(4) Uani 1 1 d . . . 
H4A H -0.1904 -0.7628 -0.3933 0.029 Uiso 1 1 calc R . . 
C5 C 0.0024(4) -0.7940(2) -0.29080(9) 0.0259(5) Uani 1 1 d . . . 
H5A H -0.1076 -0.8627 -0.2623 0.031 Uiso 1 1 calc R . . 
C6 C 0.2101(4) -0.75394(19) -0.25546(8) 0.0253(5) Uani 1 1 d . . . 
H6A H 0.2427 -0.7950 -0.2027 0.030 Uiso 1 1 calc R . . 
C7 C 0.3721(4) -0.6538(2) -0.29666(9) 0.0245(5) Uani 1 1 d . . . 
H7A H 0.5159 -0.6272 -0.2723 0.029 Uiso 1 1 calc R . . 
C8 C 0.3235(4) -0.59204(19) -0.37399(9) 0.0230(5) Uani 1 1 d . . . 
H8B H 0.4328 -0.5229 -0.4026 0.028 Uiso 1 1 calc R . . 
 
loop_ 
 _atom_site_aniso_label 
 _atom_site_aniso_U_11 
 _atom_site_aniso_U_22 
 _atom_site_aniso_U_33 
 _atom_site_aniso_U_23 
 _atom_site_aniso_U_13 
 _atom_site_aniso_U_12 
O1 0.0332(11) 0.0353(6) 0.0252(5) -0.0007(5) 0.0044(5) 0.0120(6) 
O2 0.0321(10) 0.0304(5) 0.0189(4) 0.0015(4) 0.0046(5) 0.0093(6) 
C1 0.0231(14) 0.0202(6) 0.0223(6) 0.0001(5) -0.0003(7) -0.0032(7) 
C2 0.0376(15) 0.0238(7) 0.0216(6) 0.0017(5) -0.0019(7) -0.0018(8) 
C3 0.0229(14) 0.0215(6) 0.0189(6) -0.0007(5) 0.0038(7) 0.0041(7) 
C4 0.0178(14) 0.0284(7) 0.0267(6) -0.0008(6) 0.0000(7) -0.0021(8) 
C5 0.0261(16) 0.0252(7) 0.0264(7) 0.0024(6) 0.0072(7) -0.0028(8) 
C6 0.0310(15) 0.0244(7) 0.0204(6) 0.0000(5) 0.0000(7) 0.0044(8) 
C7 0.0179(15) 0.0267(7) 0.0288(7) -0.0066(6) -0.0017(7) 0.0012(8) 
C8 0.0211(15) 0.0205(6) 0.0275(7) -0.0018(5) 0.0077(7) -0.0008(7) 
 
_geom_special_details 
; 
 All esds (except the esd in the dihedral angle between two l.s. planes) 
 are estimated using the full covariance matrix.  The cell esds are taken 
 into account individually in the estimation of esds in distances, angles 
 and torsion angles; correlations between esds in cell parameters are only 
 used when they are defined by crystal symmetry.  An approximate (isotropic) 
 treatment of cell esds is used for estimating esds involving l.s. planes. 
; 
 
loop_ 
 _geom_bond_atom_site_label_1 
 _geom_bond_atom_site_label_2 
 _geom_bond_distance 
 _geom_bond_site_symmetry_2 
 _geom_bond_publ_flag 
O1 C1 1.1956(19) . ? 
O2 C1 1.363(2) . ? 
O2 C3 1.4130(16) . ? 
C1 C2 1.5001(18) . ? 
C2 H2A 0.9800 . ? 
C2 H2B 0.9800 . ? 
C2 H2C 0.9800 . ? 
C3 C8 1.371(3) . ? 
C3 C4 1.382(2) . ? 
C4 C5 1.398(2) . ? 
C4 H4A 0.9500 . ? 
C5 C6 1.377(3) . ? 
C5 H5A 0.9500 . ? 
C6 C7 1.388(3) . ? 
C6 H6A 0.9500 . ? 
C7 C8 1.398(2) . ? 
C7 H7A 0.9500 . ? 
C8 H8B 0.9500 . ? 
 
loop_ 
 _geom_angle_atom_site_label_1 
 _geom_angle_atom_site_label_2 
 _geom_angle_atom_site_label_3 
 _geom_angle 
 _geom_angle_site_symmetry_1 
 _geom_angle_site_symmetry_3 
 _geom_angle_publ_flag 
C1 O2 C3 117.26(12) . . ? 
O1 C1 O2 123.21(13) . . ? 
O1 C1 C2 126.14(16) . . ? 
O2 C1 C2 110.66(13) . . ? 
C1 C2 H2A 109.5 . . ? 
C1 C2 H2B 109.5 . . ? 
H2A C2 H2B 109.5 . . ? 
C1 C2 H2C 109.5 . . ? 
H2A C2 H2C 109.5 . . ? 
H2B C2 H2C 109.5 . . ? 
C8 C3 C4 122.42(14) . . ? 
C8 C3 O2 118.12(15) . . ? 
C4 C3 O2 119.33(17) . . ? 
C3 C4 C5 118.16(18) . . ? 
C3 C4 H4A 120.9 . . ? 
C5 C4 H4A 120.9 . . ? 
C6 C5 C4 120.54(16) . . ? 
C6 C5 H5A 119.7 . . ? 
C4 C5 H5A 119.7 . . ? 
C5 C6 C7 120.19(14) . . ? 
C5 C6 H6A 119.9 . . ? 
C7 C6 H6A 119.9 . . ? 
C6 C7 C8 119.92(18) . . ? 
C6 C7 H7A 120.0 . . ? 
C8 C7 H7A 120.0 . . ? 
C3 C8 C7 118.76(16) . . ? 
C3 C8 H8B 120.6 . . ? 
C7 C8 H8B 120.6 . . ? 
 
loop_ 
 _geom_torsion_atom_site_label_1 
 _geom_torsion_atom_site_label_2 
 _geom_torsion_atom_site_label_3 
 _geom_torsion_atom_site_label_4 
 _geom_torsion 
 _geom_torsion_site_symmetry_1 
 _geom_torsion_site_symmetry_2 
 _geom_torsion_site_symmetry_3 
 _geom_torsion_site_symmetry_4 
 _geom_torsion_publ_flag 
C3 O2 C1 O1 2.2(3) . . . . ? 
C3 O2 C1 C2 -177.64(15) . . . . ? 
C1 O2 C3 C8 -110.30(17) . . . . ? 
C1 O2 C3 C4 73.67(19) . . . . ? 
C8 C3 C4 C5 1.0(2) . . . . ? 
O2 C3 C4 C5 176.82(14) . . . . ? 
C3 C4 C5 C6 -0.7(2) . . . . ? 
C4 C5 C6 C7 0.0(2) . . . . ? 
C5 C6 C7 C8 0.6(2) . . . . ? 
C4 C3 C8 C7 -0.5(2) . . . . ? 
O2 C3 C8 C7 -176.36(13) . . . . ? 
C6 C7 C8 C3 -0.3(2) . . . . ? 
 
_diffrn_measured_fraction_theta_max    0.767 
_diffrn_reflns_theta_full              28.00 
_diffrn_measured_fraction_theta_full   0.767 
_refine_diff_density_max    0.161 
_refine_diff_density_min   -0.144 
_refine_diff_density_rms    0.029 


 
data_II1 
 
_audit_creation_method            SHELXL-97 
_chemical_name_systematic 
; 
 ? 
; 
_chemical_name_common             ? 
_chemical_melting_point           ? 
_chemical_formula_moiety
 'C6 Cl2 F4 Hg2, C4 H8 O2'            
_chemical_formula_sum 
 'C10 H8 Cl2 F4 Hg2 O2' 
_chemical_formula_weight          708.24 
 
loop_ 
 _atom_type_symbol 
 _atom_type_description 
 _atom_type_scat_dispersion_real 
 _atom_type_scat_dispersion_imag 
 _atom_type_scat_source 
 'C'  'C'   0.0033   0.0016 
 'International Tables Vol C Tables 4.2.6.8 and 6.1.1.4' 
 'H'  'H'   0.0000   0.0000 
 'International Tables Vol C Tables 4.2.6.8 and 6.1.1.4' 
 'O'  'O'   0.0106   0.0060 
 'International Tables Vol C Tables 4.2.6.8 and 6.1.1.4' 
 'F'  'F'   0.0171   0.0103 
 'International Tables Vol C Tables 4.2.6.8 and 6.1.1.4' 
 'Cl'  'Cl'   0.1484   0.1585 
 'International Tables Vol C Tables 4.2.6.8 and 6.1.1.4' 
 'Hg'  'Hg'  -2.3894   9.2266 
 'International Tables Vol C Tables 4.2.6.8 and 6.1.1.4' 
 
_symmetry_cell_setting            Triclinic 
_symmetry_space_group_name_H-M    'P - 1' 
_symmetry_space_group_name_Hall   '-P 1 '
loop_ 
 _symmetry_equiv_pos_as_xyz 
 'x, y, z' 
 '-x, -y, -z' 
 
_cell_length_a                    7.200(4) 
_cell_length_b                    10.030(5) 
_cell_length_c                    11.485(6) 
_cell_angle_alpha                 69.285(7) 
_cell_angle_beta                  88.979(8) 
_cell_angle_gamma                 72.307(7) 
_cell_volume                      735.4(7) 
_cell_formula_units_Z             2 
_cell_measurement_temperature     100(2) 
_cell_measurement_reflns_used     1301 
_cell_measurement_theta_min       2.25 
_cell_measurement_theta_max       24.2 
 
_exptl_crystal_description        needle 
_exptl_crystal_colour             colorless 
_exptl_crystal_size_max           0.40 
_exptl_crystal_size_mid           0.05 
_exptl_crystal_size_min           0.01 
_exptl_crystal_density_meas       'not measured' 
_exptl_crystal_density_diffrn     3.199 
_exptl_crystal_density_method     'not measured' 
_exptl_crystal_F_000              628 
_exptl_absorpt_coefficient_mu     21.254 
_exptl_absorpt_correction_type    'multi-scan' 
_exptl_absorpt_correction_T_min   0.0429 
_exptl_absorpt_correction_T_max   0.8156 
_exptl_absorpt_process_details    'SADABS (Sheldrick, 2003)' 
 
_exptl_special_details 
; 
 ? 
; 
 
_diffrn_ambient_temperature       100(2) 
_diffrn_radiation_wavelength      0.71073 
_diffrn_radiation_type            MoK\a 
_diffrn_radiation_source          'fine-focus sealed tube' 
_diffrn_radiation_monochromator   graphite 
_diffrn_measurement_device_type   'Bruker SMART APEX II CCD area detector'
_diffrn_measurement_method        'phi and omega scans'
_diffrn_detector_area_resol_mean  ? 
_diffrn_standards_number          ? 
_diffrn_standards_interval_count  ? 
_diffrn_standards_interval_time   ? 
_diffrn_standards_decay_%         ? 
_diffrn_reflns_number             7865 
_diffrn_reflns_av_R_equivalents   0.0315 
_diffrn_reflns_av_sigmaI/netI     0.0459 
_diffrn_reflns_limit_h_min        -9 
_diffrn_reflns_limit_h_max        9 
_diffrn_reflns_limit_k_min        -13 
_diffrn_reflns_limit_k_max        13 
_diffrn_reflns_limit_l_min        -15 
_diffrn_reflns_limit_l_max        15 
_diffrn_reflns_theta_min          1.91 
_diffrn_reflns_theta_max          29.00 
_reflns_number_total              3859 
_reflns_number_gt                 3042 
_reflns_threshold_expression      'I>2\s(I)'
 
_computing_data_collection        'APEX2  (Bruker, 2005)' 
_computing_cell_refinement        'SAINT+ ver. 6.2 (Bruker, 2001)' 
_computing_data_reduction         'SAINT+ ver. 6.2 (Bruker, 2001)' 
_computing_structure_solution     'SHELXTL ver. 6.12 (Sheldrick, 2001)' 
_computing_structure_refinement   'SHELXTL ver. 6.12 (Sheldrick, 2001)' 
_computing_molecular_graphics     'SHELXTL ver. 6.12 (Sheldrick, 2001)' 
_computing_publication_material   'SHELXTL ver. 6.12 (Sheldrick, 2001)' 

 
_refine_special_details 
; 
 Refinement of F^2^ against ALL reflections.  The weighted R-factor wR and 
 goodness of fit S are based on F^2^, conventional R-factors R are based 
 on F, with F set to zero for negative F^2^. The threshold expression of 
 F^2^ > 2sigma(F^2^) is used only for calculating R-factors(gt) etc. and is 
 not relevant to the choice of reflections for refinement.  R-factors based 
 on F^2^ are statistically about twice as large as those based on F, and R- 
 factors based on ALL data will be even larger. 
; 
 
_refine_ls_structure_factor_coef  Fsqd  
_refine_ls_matrix_type            full 
_refine_ls_weighting_scheme       calc  
_refine_ls_weighting_details 
 'calc w=1/[\s^2^(Fo^2^)+(0.0300P)^2^+0.3000P] where P=(Fo^2^+2Fc^2^)/3' 
_atom_sites_solution_primary      direct 
_atom_sites_solution_secondary    difmap 
_atom_sites_solution_hydrogens    geom 
_refine_ls_hydrogen_treatment     constr
_refine_ls_extinction_method      none 
_refine_ls_extinction_coef        ? 
_refine_ls_number_reflns          3859 
_refine_ls_number_parameters      183 
_refine_ls_number_restraints      0 
_refine_ls_R_factor_all           0.0416 
_refine_ls_R_factor_gt            0.0335 
_refine_ls_wR_factor_ref          0.0768 
_refine_ls_wR_factor_gt           0.0750 
_refine_ls_goodness_of_fit_ref    1.001 
_refine_ls_restrained_S_all       1.001 
_refine_ls_shift/su_max           0.001 
_refine_ls_shift/su_mean          0.000 
 
loop_ 
 _atom_site_label 
 _atom_site_type_symbol 
 _atom_site_fract_x 
 _atom_site_fract_y 
 _atom_site_fract_z 
 _atom_site_U_iso_or_equiv 
 _atom_site_adp_type 
 _atom_site_occupancy 
 _atom_site_symmetry_multiplicity 
 _atom_site_calc_flag 
 _atom_site_refinement_flags 
 _atom_site_disorder_assembly 
 _atom_site_disorder_group 
Hg1 Hg 0.35479(4) 0.39391(3) 0.94234(3) 0.03969(9) Uani 1 1 d . . . 
Hg2 Hg 0.87794(4) 0.22317(3) 0.88740(3) 0.04195(9) Uani 1 1 d . . . 
Cl1 Cl 0.2424(3) 0.4476(2) 1.11551(18) 0.0484(4) Uani 1 1 d . . . 
Cl2 Cl 1.1745(3) 0.1158(2) 1.0113(2) 0.0497(4) Uani 1 1 d . . . 
F3 F 0.8602(6) 0.2249(6) 0.6233(5) 0.0536(12) Uani 1 1 d . . . 
F4 F 0.5658(7) 0.2944(6) 0.4478(5) 0.0556(12) Uani 1 1 d . . . 
F5 F 0.1889(7) 0.4020(6) 0.4907(5) 0.0549(12) Uani 1 1 d . . . 
F6 F 0.1040(6) 0.4395(5) 0.7087(4) 0.0473(10) Uani 1 1 d . . . 
O1 O 0.7001(8) 0.2326(7) 1.1034(5) 0.0529(14) Uani 1 1 d . . . 
O2 O 0.8416(8) 0.1094(6) 1.3002(5) 0.0475(13) Uani 1 1 d . . . 
C1 C 0.4413(11) 0.3545(8) 0.7832(7) 0.0389(15) Uani 1 1 d . . . 
C2 C 0.6374(11) 0.2974(8) 0.7605(7) 0.0407(16) Uani 1 1 d . . . 
C3 C 0.6748(11) 0.2794(9) 0.6489(8) 0.0450(17) Uani 1 1 d . . . 
C4 C 0.5275(12) 0.3140(9) 0.5553(8) 0.0461(17) Uani 1 1 d . . . 
C5 C 0.3347(11) 0.3691(9) 0.5780(7) 0.0421(16) Uani 1 1 d . . . 
C6 C 0.2953(11) 0.3864(8) 0.6903(7) 0.0405(15) Uani 1 1 d . . . 
C7 C 0.6016(13) 0.0282(10) 1.2405(9) 0.057(2) Uani 1 1 d . . . 
H7A H 0.6086 -0.0192 1.1785 0.085 Uiso 1 1 calc R . . 
H7B H 0.4648 0.0837 1.2434 0.085 Uiso 1 1 calc R . . 
H7C H 0.6547 -0.0494 1.3230 0.085 Uiso 1 1 calc R . . 
C8 C 0.7186(11) 0.1340(10) 1.2050(8) 0.0462(18) Uani 1 1 d . . . 
C9 C 0.9595(13) 0.2114(10) 1.2792(9) 0.055(2) Uani 1 1 d . . . 
H9A H 0.8771 0.3104 1.2792 0.066 Uiso 1 1 calc R . . 
H9B H 1.0134 0.2265 1.1973 0.066 Uiso 1 1 calc R . . 
C10 C 1.1242(13) 0.1406(11) 1.3835(8) 0.057(2) Uani 1 1 d . . . 
H10A H 1.2017 0.2085 1.3736 0.085 Uiso 1 1 calc R . . 
H10B H 1.2084 0.0450 1.3803 0.085 Uiso 1 1 calc R . . 
H10C H 1.0694 0.1226 1.4643 0.085 Uiso 1 1 calc R . . 
 
loop_ 
 _atom_site_aniso_label 
 _atom_site_aniso_U_11 
 _atom_site_aniso_U_22 
 _atom_site_aniso_U_33 
 _atom_site_aniso_U_23 
 _atom_site_aniso_U_13 
 _atom_site_aniso_U_12 
Hg1 0.04010(15) 0.03983(17) 0.04015(16) -0.01499(13) 0.00466(11) -0.01372(12) 
Hg2 0.03618(15) 0.03986(17) 0.04839(18) -0.01414(14) 0.00361(12) -0.01244(12) 
Cl1 0.0606(11) 0.0433(10) 0.0445(10) -0.0185(9) 0.0124(9) -0.0183(9) 
Cl2 0.0398(9) 0.0427(10) 0.0626(12) -0.0141(9) -0.0036(8) -0.0133(8) 
F3 0.045(2) 0.059(3) 0.058(3) -0.027(3) 0.013(2) -0.011(2) 
F4 0.057(3) 0.064(3) 0.047(3) -0.026(2) 0.012(2) -0.014(2) 
F5 0.052(3) 0.061(3) 0.051(3) -0.024(2) -0.002(2) -0.012(2) 
F6 0.037(2) 0.056(3) 0.050(3) -0.022(2) 0.0051(19) -0.014(2) 
O1 0.045(3) 0.058(4) 0.042(3) -0.005(3) 0.006(2) -0.015(3) 
O2 0.045(3) 0.045(3) 0.051(3) -0.012(3) 0.001(2) -0.019(2) 
C1 0.046(4) 0.033(4) 0.037(4) -0.010(3) 0.005(3) -0.015(3) 
C2 0.042(4) 0.033(4) 0.048(4) -0.016(3) 0.003(3) -0.012(3) 
C3 0.042(4) 0.047(4) 0.048(4) -0.018(4) 0.014(3) -0.017(3) 
C4 0.053(4) 0.037(4) 0.045(4) -0.015(4) 0.008(3) -0.012(3) 
C5 0.044(4) 0.044(4) 0.040(4) -0.016(3) 0.002(3) -0.013(3) 
C6 0.041(4) 0.035(4) 0.044(4) -0.011(3) 0.007(3) -0.013(3) 
C7 0.057(5) 0.053(5) 0.059(5) -0.015(4) -0.003(4) -0.022(4) 
C8 0.040(4) 0.049(5) 0.046(4) -0.017(4) 0.005(3) -0.011(3) 
C9 0.052(5) 0.053(5) 0.059(5) -0.010(4) 0.000(4) -0.029(4) 
C10 0.057(5) 0.065(6) 0.048(5) -0.015(4) 0.006(4) -0.027(4) 
 
_geom_special_details 
; 
 All esds (except the esd in the dihedral angle between two l.s. planes) 
 are estimated using the full covariance matrix.  The cell esds are taken 
 into account individually in the estimation of esds in distances, angles 
 and torsion angles; correlations between esds in cell parameters are only 
 used when they are defined by crystal symmetry.  An approximate (isotropic) 
 treatment of cell esds is used for estimating esds involving l.s. planes. 
; 
 
loop_ 
 _geom_bond_atom_site_label_1 
 _geom_bond_atom_site_label_2 
 _geom_bond_distance 
 _geom_bond_site_symmetry_2 
 _geom_bond_publ_flag 
Hg1 C1 2.051(7) . ? 
Hg1 Cl1 2.310(2) . ? 
Hg2 C2 2.054(7) . ? 
Hg2 Cl2 2.318(2) . ? 
F3 C3 1.351(8) . ? 
F4 C4 1.329(9) . ? 
F5 C5 1.345(8) . ? 
F6 C6 1.360(8) . ? 
O1 C8 1.211(10) . ? 
O2 C8 1.323(9) . ? 
O2 C9 1.474(9) . ? 
C1 C6 1.392(10) . ? 
C1 C2 1.411(10) . ? 
C2 C3 1.368(11) . ? 
C3 C4 1.397(11) . ? 
C4 C5 1.387(11) . ? 
C5 C6 1.375(10) . ? 
C7 C8 1.492(12) . ? 
C7 H7A 0.9800 . ? 
C7 H7B 0.9800 . ? 
C7 H7C 0.9800 . ? 
C9 C10 1.511(12) . ? 
C9 H9A 0.9900 . ? 
C9 H9B 0.9900 . ? 
C10 H10A 0.9800 . ? 
C10 H10B 0.9800 . ? 
C10 H10C 0.9800 . ? 
 
loop_ 
 _geom_angle_atom_site_label_1 
 _geom_angle_atom_site_label_2 
 _geom_angle_atom_site_label_3 
 _geom_angle 
 _geom_angle_site_symmetry_1 
 _geom_angle_site_symmetry_3 
 _geom_angle_publ_flag 
C1 Hg1 Cl1 177.0(2) . . ? 
C2 Hg2 Cl2 170.5(2) . . ? 
C8 O2 C9 116.7(6) . . ? 
C6 C1 C2 117.4(7) . . ? 
C6 C1 Hg1 117.5(5) . . ? 
C2 C1 Hg1 125.0(5) . . ? 
C3 C2 C1 119.0(7) . . ? 
C3 C2 Hg2 115.6(6) . . ? 
C1 C2 Hg2 125.3(6) . . ? 
F3 C3 C2 121.0(7) . . ? 
F3 C3 C4 115.8(7) . . ? 
C2 C3 C4 123.2(7) . . ? 
F4 C4 C5 119.6(7) . . ? 
F4 C4 C3 122.6(7) . . ? 
C5 C4 C3 117.8(7) . . ? 
F5 C5 C6 121.0(7) . . ? 
F5 C5 C4 119.4(7) . . ? 
C6 C5 C4 119.5(7) . . ? 
F6 C6 C5 117.4(7) . . ? 
F6 C6 C1 119.6(7) . . ? 
C5 C6 C1 123.0(7) . . ? 
C8 C7 H7A 109.5 . . ? 
C8 C7 H7B 109.5 . . ? 
H7A C7 H7B 109.5 . . ? 
C8 C7 H7C 109.5 . . ? 
H7A C7 H7C 109.5 . . ? 
H7B C7 H7C 109.5 . . ? 
O1 C8 O2 124.1(8) . . ? 
O1 C8 C7 124.6(8) . . ? 
O2 C8 C7 111.3(7) . . ? 
O2 C9 C10 107.9(7) . . ? 
O2 C9 H9A 110.1 . . ? 
C10 C9 H9A 110.1 . . ? 
O2 C9 H9B 110.1 . . ? 
C10 C9 H9B 110.1 . . ? 
H9A C9 H9B 108.4 . . ? 
C9 C10 H10A 109.5 . . ? 
C9 C10 H10B 109.5 . . ? 
H10A C10 H10B 109.5 . . ? 
C9 C10 H10C 109.5 . . ? 
H10A C10 H10C 109.5 . . ? 
H10B C10 H10C 109.5 . . ? 
 
loop_ 
 _geom_torsion_atom_site_label_1 
 _geom_torsion_atom_site_label_2 
 _geom_torsion_atom_site_label_3 
 _geom_torsion_atom_site_label_4 
 _geom_torsion 
 _geom_torsion_site_symmetry_1 
 _geom_torsion_site_symmetry_2 
 _geom_torsion_site_symmetry_3 
 _geom_torsion_site_symmetry_4 
 _geom_torsion_publ_flag 
C6 C1 C2 C3 1.4(11) . . . . ? 
Hg1 C1 C2 C3 -178.6(6) . . . . ? 
C6 C1 C2 Hg2 -174.1(5) . . . . ? 
Hg1 C1 C2 Hg2 5.9(9) . . . . ? 
C1 C2 C3 F3 -179.9(7) . . . . ? 
Hg2 C2 C3 F3 -4.0(10) . . . . ? 
C1 C2 C3 C4 -0.4(12) . . . . ? 
Hg2 C2 C3 C4 175.5(6) . . . . ? 
F3 C3 C4 F4 0.2(12) . . . . ? 
C2 C3 C4 F4 -179.2(7) . . . . ? 
F3 C3 C4 C5 179.5(7) . . . . ? 
C2 C3 C4 C5 0.0(13) . . . . ? 
F4 C4 C5 F5 0.0(12) . . . . ? 
C3 C4 C5 F5 -179.3(7) . . . . ? 
F4 C4 C5 C6 178.7(7) . . . . ? 
C3 C4 C5 C6 -0.6(12) . . . . ? 
F5 C5 C6 F6 -0.7(11) . . . . ? 
C4 C5 C6 F6 -179.4(7) . . . . ? 
F5 C5 C6 C1 -179.7(7) . . . . ? 
C4 C5 C6 C1 1.6(12) . . . . ? 
C2 C1 C6 F6 179.0(6) . . . . ? 
Hg1 C1 C6 F6 -1.0(9) . . . . ? 
C2 C1 C6 C5 -2.0(11) . . . . ? 
Hg1 C1 C6 C5 178.0(6) . . . . ? 
C9 O2 C8 O1 1.0(12) . . . . ? 
C9 O2 C8 C7 -177.2(7) . . . . ? 
C8 O2 C9 C10 -165.1(7) . . . . ? 
 
_diffrn_measured_fraction_theta_max    0.986 
_diffrn_reflns_theta_full              29.00 
_diffrn_measured_fraction_theta_full   0.986 
_refine_diff_density_max    2.468 
_refine_diff_density_min   -1.405 
_refine_diff_density_rms    0.222 


 
data_2(II)2 
 
_audit_creation_method            SHELXL-97 
_chemical_name_systematic 
; 
 ? 
; 
_chemical_name_common             ? 
_chemical_melting_point           ? 
_chemical_formula_moiety          
 'C5 H10 O3, 2(C6 Cl2 F4 Hg2)'  
_chemical_formula_sum 
 'C17 H10 Cl4 F8 Hg4 O3' 
_chemical_formula_weight          1358.41 
 
loop_ 
 _atom_type_symbol 
 _atom_type_description 
 _atom_type_scat_dispersion_real 
 _atom_type_scat_dispersion_imag 
 _atom_type_scat_source 
 'C'  'C'   0.0033   0.0016 
 'International Tables Vol C Tables 4.2.6.8 and 6.1.1.4' 
 'H'  'H'   0.0000   0.0000 
 'International Tables Vol C Tables 4.2.6.8 and 6.1.1.4' 
 'O'  'O'   0.0106   0.0060 
 'International Tables Vol C Tables 4.2.6.8 and 6.1.1.4' 
 'F'  'F'   0.0171   0.0103 
 'International Tables Vol C Tables 4.2.6.8 and 6.1.1.4' 
 'Cl'  'Cl'   0.1484   0.1585 
 'International Tables Vol C Tables 4.2.6.8 and 6.1.1.4' 
 'Hg'  'Hg'  -2.3894   9.2266 
 'International Tables Vol C Tables 4.2.6.8 and 6.1.1.4' 
 
_symmetry_cell_setting            Monoclinic 
_symmetry_space_group_name_H-M    'P 21/c' 
_symmetry_space_group_name_Hall   '-P 2ybc '
loop_ 
 _symmetry_equiv_pos_as_xyz 
 'x, y, z' 
 '-x, y+1/2, -z+1/2' 
 '-x, -y, -z' 
 'x, -y-1/2, z-1/2' 
 
_cell_length_a                    20.4533(13) 
_cell_length_b                    7.3948(5) 
_cell_length_c                    26.5695(18) 
_cell_angle_alpha                 90.00 
_cell_angle_beta                  91.6840(10) 
_cell_angle_gamma                 90.00 
_cell_volume                      4016.9(5) 
_cell_formula_units_Z             6 
_cell_measurement_temperature     100(2) 
_cell_measurement_reflns_used     7225 
_cell_measurement_theta_min       2.48 
_cell_measurement_theta_max       30.54 
 
_exptl_crystal_description        plate 
_exptl_crystal_colour             colorless 
_exptl_crystal_size_max           0.50 
_exptl_crystal_size_mid           0.20 
_exptl_crystal_size_min           0.05 
_exptl_crystal_density_meas       'not measured' 
_exptl_crystal_density_diffrn     3.369 
_exptl_crystal_density_method     'not measured' 
_exptl_crystal_F_000              3576 
_exptl_absorpt_coefficient_mu     23.335 
_exptl_absorpt_correction_type    'numerical' 
_exptl_absorpt_correction_T_min   0.0302 
_exptl_absorpt_correction_T_max   0.3883 
_exptl_absorpt_process_details    'APEX2  (Bruker, 2005)' 
 
_exptl_special_details 
; 
 ? 
; 
 
_diffrn_ambient_temperature       100(2) 
_diffrn_radiation_wavelength      0.71073 
_diffrn_radiation_type            MoK\a 
_diffrn_radiation_source          'fine-focus sealed tube' 
_diffrn_radiation_monochromator   graphite 
_diffrn_measurement_device_type   'Bruker SMART APEX II CCD area detector'
_diffrn_measurement_method        'phi and omega scans'
_diffrn_detector_area_resol_mean  ? 
_diffrn_standards_number          ? 
_diffrn_standards_interval_count  ? 
_diffrn_standards_interval_time   ? 
_diffrn_standards_decay_%         ? 
_diffrn_reflns_number             41462 
_diffrn_reflns_av_R_equivalents   0.0562 
_diffrn_reflns_av_sigmaI/netI     0.0515 
_diffrn_reflns_limit_h_min        -27 
_diffrn_reflns_limit_h_max        27 
_diffrn_reflns_limit_k_min        -10 
_diffrn_reflns_limit_k_max        10 
_diffrn_reflns_limit_l_min        -36 
_diffrn_reflns_limit_l_max        36 
_diffrn_reflns_theta_min          1.85 
_diffrn_reflns_theta_max          29.00 
_reflns_number_total              10656 
_reflns_number_gt                 8099 
_reflns_threshold_expression      'I>2\s(I)'
 
_computing_data_collection        'APEX2  (Bruker, 2005)' 
_computing_cell_refinement        'SAINT+ ver. 6.2 (Bruker, 2001)' 
_computing_data_reduction         'SAINT+ ver. 6.2 (Bruker, 2001)' 
_computing_structure_solution     'SHELXTL ver. 6.12 (Sheldrick, 2001)' 
_computing_structure_refinement   'SHELXTL ver. 6.12 (Sheldrick, 2001)' 
_computing_molecular_graphics     'SHELXTL ver. 6.12 (Sheldrick, 2001)' 
_computing_publication_material   'SHELXTL ver. 6.12 (Sheldrick, 2001)' 

 
_refine_special_details 
; 
 Refinement of F^2^ against ALL reflections.  The weighted R-factor wR and 
 goodness of fit S are based on F^2^, conventional R-factors R are based 
 on F, with F set to zero for negative F^2^. The threshold expression of 
 F^2^ > 2sigma(F^2^) is used only for calculating R-factors(gt) etc. and is 
 not relevant to the choice of reflections for refinement.  R-factors based 
 on F^2^ are statistically about twice as large as those based on F, and R- 
 factors based on ALL data will be even larger. 
; 
 
_refine_ls_structure_factor_coef  Fsqd  
_refine_ls_matrix_type            full 
_refine_ls_weighting_scheme       calc  
_refine_ls_weighting_details 
 'calc w=1/[\s^2^(Fo^2^)+(0.0300P)^2^+22.5000P] where P=(Fo^2^+2Fc^2^)/3' 
_atom_sites_solution_primary      direct 
_atom_sites_solution_secondary    difmap 
_atom_sites_solution_hydrogens    geom 
_refine_ls_hydrogen_treatment     constr 
_refine_ls_extinction_method      none 
_refine_ls_extinction_coef        ? 
_refine_ls_number_reflns          10656 
_refine_ls_number_parameters      475 
_refine_ls_number_restraints      10 
_refine_ls_R_factor_all           0.0621 
_refine_ls_R_factor_gt            0.0416 
_refine_ls_wR_factor_ref          0.0947 
_refine_ls_wR_factor_gt           0.0867 
_refine_ls_goodness_of_fit_ref    1.033 
_refine_ls_restrained_S_all       1.033 
_refine_ls_shift/su_max           0.002 
_refine_ls_shift/su_mean          0.000 
 
loop_ 
 _atom_site_label 
 _atom_site_type_symbol 
 _atom_site_fract_x 
 _atom_site_fract_y 
 _atom_site_fract_z 
 _atom_site_U_iso_or_equiv 
 _atom_site_adp_type 
 _atom_site_occupancy 
 _atom_site_symmetry_multiplicity 
 _atom_site_calc_flag 
 _atom_site_refinement_flags 
 _atom_site_disorder_assembly 
 _atom_site_disorder_group 
Hg1A Hg 0.150639(18) 1.51303(5) 0.345952(14) 0.03398(9) Uani 1 1 d . . . 
Hg2A Hg 0.243448(18) 1.94715(5) 0.351654(13) 0.03369(9) Uani 1 1 d . . . 
Hg3A Hg 0.431389(17) 1.09412(4) 0.325005(13) 0.02819(8) Uani 1 1 d . . . 
Hg4A Hg 0.523370(16) 1.52336(4) 0.325559(12) 0.02707(8) Uani 1 1 d . . . 
Cl1A Cl 0.16796(15) 1.2702(3) 0.39982(10) 0.0500(7) Uani 1 1 d . . . 
Cl2A Cl 0.32886(13) 2.0183(4) 0.40797(9) 0.0468(6) Uani 1 1 d . . . 
Cl3A Cl 0.34665(11) 1.0331(3) 0.26779(9) 0.0362(5) Uani 1 1 d . . . 
Cl4A Cl 0.50115(12) 1.7658(3) 0.27304(9) 0.0352(5) Uani 1 1 d . . . 
F3A F 0.1817(3) 2.1876(8) 0.2677(2) 0.0468(15) Uani 1 1 d . . . 
F4A F 0.0894(4) 2.1343(9) 0.1957(3) 0.067(2) Uani 1 1 d . . . 
F5A F 0.0261(4) 1.8094(10) 0.1890(3) 0.086(3) Uani 1 1 d . . . 
F6A F 0.0544(3) 1.5440(9) 0.2553(3) 0.0599(19) Uani 1 1 d . . . 
F9A F 0.6320(3) 1.4884(7) 0.4082(2) 0.0385(13) Uani 1 1 d . . . 
F10A F 0.6695(3) 1.2214(8) 0.4702(2) 0.0503(16) Uani 1 1 d . . . 
F11A F 0.6038(3) 0.9006(8) 0.4692(2) 0.0562(17) Uani 1 1 d . . . 
F12A F 0.5003(3) 0.8517(7) 0.4065(2) 0.0451(14) Uani 1 1 d . . . 
O1A O 0.2822(3) 1.5721(10) 0.3520(3) 0.0482(18) Uani 1 1 d . . . 
O2A O 0.3851(3) 1.4933(9) 0.3761(3) 0.0407(16) Uani 1 1 d . . . 
O3A O 0.3601(3) 1.5051(9) 0.2978(3) 0.0441(17) Uani 1 1 d . . . 
C1A C 0.1342(5) 1.7266(13) 0.2977(4) 0.037(2) Uani 1 1 d . . . 
C2A C 0.1687(5) 1.8896(12) 0.3006(3) 0.034(2) Uani 1 1 d . . . 
C3A C 0.1520(5) 2.0228(14) 0.2658(4) 0.041(2) Uani 1 1 d . . . 
C4A C 0.1036(6) 1.9992(16) 0.2293(5) 0.057(3) Uani 1 1 d . . . 
C5A C 0.0729(6) 1.8374(17) 0.2245(5) 0.059(3) Uani 1 1 d . . . 
C6A C 0.0874(5) 1.7028(15) 0.2586(4) 0.045(3) Uani 1 1 d . . . 
C7A C 0.5103(4) 1.1462(11) 0.3725(3) 0.0283(18) Uani 1 1 d . . . 
C8A C 0.5454(5) 1.3110(11) 0.3730(3) 0.0298(19) Uani 1 1 d . . . 
C9A C 0.5972(4) 1.3307(12) 0.4069(4) 0.0314(19) Uani 1 1 d . . . 
C10A C 0.6173(5) 1.1982(14) 0.4390(4) 0.040(2) Uani 1 1 d . . . 
C11A C 0.5846(5) 1.0336(13) 0.4383(4) 0.038(2) Uani 1 1 d . . . 
C12A C 0.5317(5) 1.0135(12) 0.4051(4) 0.034(2) Uani 1 1 d . . . 
C15A C 0.4234(6) 1.4664(16) 0.4623(4) 0.053(3) Uani 1 1 d . . . 
H15A H 0.4122 1.4743 0.4978 0.079 Uiso 1 1 calc R . . 
H15B H 0.4578 1.5543 0.4553 0.079 Uiso 1 1 calc R . . 
H15C H 0.4390 1.3442 0.4549 0.079 Uiso 1 1 calc R . . 
C14A C 0.3636(5) 1.5072(15) 0.4297(4) 0.046(3) Uani 1 1 d . . . 
H14A H 0.3284 1.4189 0.4361 0.056 Uiso 1 1 calc R . . 
H14B H 0.3472 1.6303 0.4367 0.056 Uiso 1 1 calc R . . 
C13A C 0.3375(4) 1.5270(14) 0.3429(3) 0.036(2) Uani 1 1 d . . . 
C16A C 0.3144(5) 1.5319(13) 0.2552(4) 0.035(2) Uani 1 1 d . . . 
H16A H 0.2855 1.6360 0.2619 0.042 Uiso 1 1 calc R . . 
H16B H 0.2867 1.4230 0.2506 0.042 Uiso 1 1 calc R . . 
C17A C 0.3511(6) 1.5661(16) 0.2085(4) 0.051(3) Uani 1 1 d . . . 
H17A H 0.3201 1.5848 0.1801 0.077 Uiso 1 1 calc R . . 
H17B H 0.3790 1.4619 0.2015 0.077 Uiso 1 1 calc R . . 
H17C H 0.3783 1.6743 0.2130 0.077 Uiso 1 1 calc R . . 
Hg1B Hg 1.187518(17) 1.01104(5) 0.499782(13) 0.03124(9) Uani 1 1 d . . . 
Hg2B Hg 1.093778(17) 1.44388(5) 0.488161(14) 0.03427(9) Uani 1 1 d . . . 
Cl1B Cl 1.18117(12) 0.7634(3) 0.44680(9) 0.0389(5) Uani 1 1 d . . . 
Cl2B Cl 1.01546(12) 1.5182(4) 0.42690(10) 0.0498(7) Uani 1 1 d . . . 
F3B F 1.1434(3) 1.6828(8) 0.5760(2) 0.0475(15) Uani 1 1 d . . . 
F4B F 1.2270(3) 1.6301(9) 0.6549(2) 0.0549(17) Uani 1 1 d . . . 
F5B F 1.2907(4) 1.3073(9) 0.6650(2) 0.0597(18) Uani 1 1 d . . . 
F6B F 1.2718(3) 1.0426(8) 0.5965(2) 0.0475(15) Uani 1 1 d . . . 
C1B C 1.1959(5) 1.2214(13) 0.5495(4) 0.035(2) Uani 1 1 d . . . 
C2B C 1.1634(4) 1.3868(13) 0.5437(4) 0.034(2) Uani 1 1 d . . . 
C3B C 1.1734(5) 1.5198(13) 0.5800(4) 0.036(2) Uani 1 1 d . . . 
C4B C 1.2155(5) 1.4980(13) 0.6202(4) 0.042(2) Uani 1 1 d . . . 
C5B C 1.2494(5) 1.3360(14) 0.6257(3) 0.039(2) Uani 1 1 d . . . 
C6B C 1.2389(5) 1.2023(13) 0.5900(4) 0.035(2) Uani 1 1 d . . . 
O1B O 1.0527(2) 1.0688(15) 0.4952(2) 0.0511(15) Uani 0.50 1 d PD . . 
O2B O 1.0472(2) 1.0145(18) 0.53590(15) 0.0511(15) Uani 0.50 1 d PD . . 
O3B O 1.0308(3) 1.0244(18) 0.45676(11) 0.0511(15) Uani 0.50 1 d P . . 
C13B C 1.0000 1.0000 0.5000 0.0511(15) Uani 1 2 d SD . . 
C14B C 1.0171(4) 0.9953(15) 0.58474(7) 0.0511(15) Uani 1 1 d D . . 
H14G H 1.0018 0.8736 0.5889 0.061 Uiso 0.50 1 d PR . . 
H14J H 0.9799 1.0745 0.5859 0.061 Uiso 0.50 1 d PR . . 
H14C H 1.0425 0.8871 0.5893 0.061 Uiso 0.50 1 d PR . . 
H14D H 1.0459 1.0953 0.5792 0.061 Uiso 0.50 1 d PR . . 
C15B C 1.0660(9) 1.042(3) 0.6264(7) 0.0511(15) Uani 0.50 1 d PD . . 
H15G H 1.0448 1.0295 0.6579 0.077 Uiso 0.50 1 d PR . . 
H15H H 1.1028 0.9615 0.6257 0.077 Uiso 0.50 1 d PR . . 
H15I H 1.0808 1.1643 0.6226 0.077 Uiso 0.50 1 d PR . . 
C16B C 0.9731(8) 1.036(3) 0.6280(6) 0.0511(15) Uani 0.50 1 d PD . . 
H16C H 1.0003 1.0507 0.6577 0.077 Uiso 0.50 1 d PR . . 
H16D H 0.9476 1.1433 0.6222 0.077 Uiso 0.50 1 d PR . . 
H16E H 0.9443 0.9347 0.6323 0.077 Uiso 0.50 1 d PR . . 
 
loop_ 
 _atom_site_aniso_label 
 _atom_site_aniso_U_11 
 _atom_site_aniso_U_22 
 _atom_site_aniso_U_33 
 _atom_site_aniso_U_23 
 _atom_site_aniso_U_13 
 _atom_site_aniso_U_12 
Hg1A 0.03369(18) 0.03409(19) 0.03423(19) -0.00691(14) 0.00218(14) -0.00360(14) 
Hg2A 0.03132(18) 0.0383(2) 0.03146(18) -0.00155(14) 0.00088(14) -0.00520(15) 
Hg3A 0.03025(17) 0.02537(16) 0.02891(17) -0.00046(13) 0.00010(13) -0.00224(13) 
Hg4A 0.03135(17) 0.02276(16) 0.02697(16) 0.00014(12) -0.00113(12) -0.00073(13) 
Cl1A 0.074(2) 0.0370(13) 0.0393(14) -0.0011(11) 0.0165(13) -0.0005(13) 
Cl2A 0.0385(13) 0.0680(18) 0.0336(12) -0.0017(12) -0.0035(10) -0.0174(12) 
Cl3A 0.0337(11) 0.0391(12) 0.0355(12) -0.0001(9) -0.0045(9) -0.0069(10) 
Cl4A 0.0469(13) 0.0250(10) 0.0337(12) 0.0015(9) 0.0013(10) 0.0050(9) 
F3A 0.059(4) 0.035(3) 0.046(4) 0.004(3) -0.002(3) 0.002(3) 
F4A 0.091(5) 0.056(4) 0.052(4) 0.003(3) -0.029(4) 0.026(4) 
F5A 0.105(6) 0.064(5) 0.084(6) -0.026(4) -0.068(5) 0.035(4) 
F6A 0.053(4) 0.047(4) 0.078(5) -0.024(3) -0.029(4) 0.002(3) 
F9A 0.038(3) 0.032(3) 0.045(3) -0.004(2) -0.011(2) -0.010(2) 
F10A 0.049(4) 0.058(4) 0.043(3) -0.005(3) -0.020(3) 0.002(3) 
F11A 0.078(5) 0.043(4) 0.046(4) 0.016(3) -0.022(3) 0.008(3) 
F12A 0.064(4) 0.028(3) 0.043(3) 0.008(2) -0.006(3) -0.012(3) 
O1A 0.029(4) 0.058(5) 0.058(5) 0.001(4) -0.001(3) 0.004(3) 
O2A 0.030(3) 0.048(4) 0.044(4) -0.006(3) 0.001(3) 0.000(3) 
O3A 0.041(4) 0.044(4) 0.047(4) -0.003(3) -0.004(3) -0.004(3) 
C1A 0.033(5) 0.039(5) 0.037(5) -0.006(4) -0.005(4) 0.006(4) 
C2A 0.039(5) 0.031(5) 0.032(5) -0.009(4) 0.008(4) -0.003(4) 
C3A 0.044(6) 0.039(6) 0.039(6) 0.000(4) 0.003(4) 0.008(5) 
C4A 0.073(8) 0.047(7) 0.050(7) -0.009(5) -0.023(6) 0.022(6) 
C5A 0.058(7) 0.055(7) 0.061(8) -0.018(6) -0.031(6) 0.027(6) 
C6A 0.035(5) 0.044(6) 0.056(7) -0.022(5) -0.013(5) -0.002(4) 
C7A 0.036(5) 0.023(4) 0.025(4) 0.000(3) 0.004(4) 0.006(3) 
C8A 0.039(5) 0.021(4) 0.030(5) 0.002(3) 0.000(4) 0.004(4) 
C9A 0.027(5) 0.027(4) 0.040(5) -0.002(4) 0.001(4) 0.003(4) 
C10A 0.037(5) 0.040(6) 0.042(6) -0.003(4) -0.012(4) 0.000(4) 
C11A 0.052(6) 0.031(5) 0.030(5) 0.005(4) -0.007(4) 0.007(4) 
C12A 0.038(5) 0.026(4) 0.036(5) 0.007(4) -0.004(4) -0.005(4) 
C15A 0.064(8) 0.059(7) 0.036(6) 0.003(5) 0.005(5) 0.021(6) 
C14A 0.050(6) 0.054(7) 0.037(6) -0.006(5) 0.009(5) 0.006(5) 
C13A 0.030(5) 0.048(6) 0.029(5) 0.004(4) -0.004(4) -0.018(4) 
C16A 0.035(5) 0.036(5) 0.035(5) -0.001(4) 0.000(4) 0.002(4) 
C17A 0.068(8) 0.058(7) 0.028(5) -0.004(5) -0.006(5) -0.003(6) 
Hg1B 0.03036(18) 0.03308(19) 0.03010(18) -0.00347(14) -0.00226(13) 0.00012(14) 
Hg2B 0.02755(17) 0.0426(2) 0.03261(18) -0.00105(15) 0.00017(13) 0.00477(15) 
Cl1B 0.0448(13) 0.0356(12) 0.0365(12) -0.0063(10) 0.0038(10) -0.0039(10) 
Cl2B 0.0333(12) 0.0767(19) 0.0392(13) 0.0088(13) -0.0032(10) 0.0053(12) 
F3B 0.055(4) 0.042(3) 0.045(3) -0.011(3) -0.001(3) 0.014(3) 
F4B 0.071(5) 0.051(4) 0.042(4) -0.016(3) -0.011(3) -0.002(3) 
F5B 0.080(5) 0.057(4) 0.041(4) -0.006(3) -0.023(3) 0.002(4) 
F6B 0.055(4) 0.039(3) 0.048(4) -0.001(3) -0.014(3) 0.009(3) 
C1B 0.031(5) 0.038(5) 0.036(5) -0.008(4) -0.001(4) -0.003(4) 
C2B 0.022(4) 0.038(5) 0.043(5) -0.004(4) 0.000(4) -0.001(4) 
C3B 0.045(6) 0.033(5) 0.030(5) 0.000(4) 0.006(4) -0.004(4) 
C4B 0.053(6) 0.037(5) 0.036(5) -0.013(4) 0.005(5) -0.010(5) 
C5B 0.045(6) 0.046(6) 0.025(5) 0.002(4) -0.012(4) -0.006(5) 
C6B 0.035(5) 0.034(5) 0.038(5) 0.003(4) -0.006(4) -0.002(4) 
O1B 0.045(3) 0.049(3) 0.058(4) -0.016(3) -0.016(3) -0.003(3) 
O2B 0.045(3) 0.049(3) 0.058(4) -0.016(3) -0.016(3) -0.003(3) 
O3B 0.045(3) 0.049(3) 0.058(4) -0.016(3) -0.016(3) -0.003(3) 
C13B 0.045(3) 0.049(3) 0.058(4) -0.016(3) -0.016(3) -0.003(3) 
C14B 0.045(3) 0.049(3) 0.058(4) -0.016(3) -0.016(3) -0.003(3) 
C15B 0.045(3) 0.049(3) 0.058(4) -0.016(3) -0.016(3) -0.003(3) 
C16B 0.045(3) 0.049(3) 0.058(4) -0.016(3) -0.016(3) -0.003(3) 
 
_geom_special_details 
; 
 All esds (except the esd in the dihedral angle between two l.s. planes) 
 are estimated using the full covariance matrix.  The cell esds are taken 
 into account individually in the estimation of esds in distances, angles 
 and torsion angles; correlations between esds in cell parameters are only 
 used when they are defined by crystal symmetry.  An approximate (isotropic) 
 treatment of cell esds is used for estimating esds involving l.s. planes. 
; 
 
loop_ 
 _geom_bond_atom_site_label_1 
 _geom_bond_atom_site_label_2 
 _geom_bond_distance 
 _geom_bond_site_symmetry_2 
 _geom_bond_publ_flag 
Hg1A C1A 2.056(10) . ? 
Hg1A Cl1A 2.317(3) . ? 
Hg2A C2A 2.058(10) . ? 
Hg2A Cl2A 2.327(2) . ? 
Hg3A C7A 2.056(9) . ? 
Hg3A Cl3A 2.316(2) . ? 
Hg4A C8A 2.056(8) . ? 
Hg4A Cl4A 2.309(2) . ? 
F3A C3A 1.362(12) . ? 
F4A C4A 1.365(13) . ? 
F5A C5A 1.342(12) . ? 
F6A C6A 1.356(12) . ? 
F9A C9A 1.366(10) . ? 
F10A C10A 1.344(10) . ? 
F11A C11A 1.334(10) . ? 
F12A C12A 1.360(10) . ? 
O1A C13A 1.211(11) . ? 
O2A C13A 1.317(11) . ? 
O2A C14A 1.505(12) . ? 
O3A C13A 1.307(11) . ? 
O3A C16A 1.461(11) . ? 
C1A C2A 1.398(13) . ? 
C1A C6A 1.402(13) . ? 
C2A C3A 1.387(14) . ? 
C3A C4A 1.376(15) . ? 
C4A C5A 1.355(17) . ? 
C5A C6A 1.372(16) . ? 
C7A C12A 1.372(12) . ? 
C7A C8A 1.415(12) . ? 
C8A C9A 1.378(12) . ? 
C9A C10A 1.354(13) . ? 
C10A C11A 1.388(14) . ? 
C11A C12A 1.384(13) . ? 
C15A C14A 1.508(15) . ? 
C15A H15A 0.9800 . ? 
C15A H15B 0.9800 . ? 
C15A H15C 0.9800 . ? 
C14A H14A 0.9900 . ? 
C14A H14B 0.9900 . ? 
C16A C17A 1.490(14) . ? 
C16A H16A 0.9900 . ? 
C16A H16B 0.9900 . ? 
C17A H17A 0.9800 . ? 
C17A H17B 0.9800 . ? 
C17A H17C 0.9800 . ? 
Hg1B C1B 2.045(9) . ? 
Hg1B Cl1B 2.311(2) . ? 
Hg2B C2B 2.064(9) . ? 
Hg2B Cl2B 2.316(3) . ? 
F3B C3B 1.355(11) . ? 
F4B C4B 1.358(11) . ? 
F5B C5B 1.341(11) . ? 
F6B C6B 1.368(11) . ? 
C1B C6B 1.377(13) . ? 
C1B C2B 1.398(13) . ? 
C2B C3B 1.388(13) . ? 
C3B C4B 1.363(15) . ? 
C4B C5B 1.390(14) . ? 
C5B C6B 1.383(13) . ? 
O1B O3B 1.152(3) . ? 
O1B O2B 1.161(3) . ? 
O1B C13B 1.2026(10) . ? 
O2B C13B 1.3416(10) . ? 
O2B C14B 1.4602(10) . ? 
O2B O3B 1.640(2) 3_776 ? 
O2B H14D 1.2978 . ? 
O3B C13B 1.3390(10) . ? 
O3B C14B 1.4605(10) 3_776 ? 
O3B O2B 1.640(2) 3_776 ? 
C13B O1B 1.2026(10) 3_776 ? 
C13B O3B 1.3390(10) 3_776 ? 
C13B O2B 1.3416(10) 3_776 ? 
C14B O3B 1.4605(10) 3_776 ? 
C14B C16B 1.5099(10) . ? 
C14B C15B 1.5102(10) . ? 
C14B H14G 0.9600 . ? 
C14B H14J 0.9601 . ? 
C14B H14C 0.9599 . ? 
C14B H14D 0.9600 . ? 
C15B H15G 0.9601 . ? 
C15B H15H 0.9600 . ? 
C15B H15I 0.9600 . ? 
C16B H14J 1.1674 . ? 
C16B H16C 0.9598 . ? 
C16B H16D 0.9601 . ? 
C16B H16E 0.9600 . ? 
 
loop_ 
 _geom_angle_atom_site_label_1 
 _geom_angle_atom_site_label_2 
 _geom_angle_atom_site_label_3 
 _geom_angle 
 _geom_angle_site_symmetry_1 
 _geom_angle_site_symmetry_3 
 _geom_angle_publ_flag 
C1A Hg1A Cl1A 179.2(3) . . ? 
C2A Hg2A Cl2A 178.5(3) . . ? 
C7A Hg3A Cl3A 176.7(2) . . ? 
C8A Hg4A Cl4A 178.4(3) . . ? 
C13A O2A C14A 113.0(8) . . ? 
C13A O3A C16A 117.3(8) . . ? 
C2A C1A C6A 118.8(10) . . ? 
C2A C1A Hg1A 123.7(7) . . ? 
C6A C1A Hg1A 117.5(8) . . ? 
C3A C2A C1A 117.4(9) . . ? 
C3A C2A Hg2A 117.2(7) . . ? 
C1A C2A Hg2A 125.4(7) . . ? 
F3A C3A C4A 116.8(10) . . ? 
F3A C3A C2A 120.6(9) . . ? 
C4A C3A C2A 122.6(10) . . ? 
C5A C4A F4A 119.8(11) . . ? 
C5A C4A C3A 119.9(11) . . ? 
F4A C4A C3A 120.2(11) . . ? 
F5A C5A C4A 121.3(11) . . ? 
F5A C5A C6A 119.3(11) . . ? 
C4A C5A C6A 119.3(10) . . ? 
F6A C6A C5A 119.2(9) . . ? 
F6A C6A C1A 119.0(10) . . ? 
C5A C6A C1A 121.8(10) . . ? 
C12A C7A C8A 117.2(8) . . ? 
C12A C7A Hg3A 118.9(7) . . ? 
C8A C7A Hg3A 123.8(6) . . ? 
C9A C8A C7A 118.5(8) . . ? 
C9A C8A Hg4A 118.1(6) . . ? 
C7A C8A Hg4A 123.4(7) . . ? 
C10A C9A F9A 117.0(8) . . ? 
C10A C9A C8A 123.2(9) . . ? 
F9A C9A C8A 119.8(8) . . ? 
F10A C10A C9A 121.1(9) . . ? 
F10A C10A C11A 119.6(9) . . ? 
C9A C10A C11A 119.2(9) . . ? 
F11A C11A C12A 121.6(9) . . ? 
F11A C11A C10A 120.4(9) . . ? 
C12A C11A C10A 118.1(8) . . ? 
F12A C12A C7A 120.3(8) . . ? 
F12A C12A C11A 116.1(8) . . ? 
C7A C12A C11A 123.7(9) . . ? 
C14A C15A H15A 109.5 . . ? 
C14A C15A H15B 109.5 . . ? 
H15A C15A H15B 109.5 . . ? 
C14A C15A H15C 109.5 . . ? 
H15A C15A H15C 109.5 . . ? 
H15B C15A H15C 109.5 . . ? 
O2A C14A C15A 106.0(8) . . ? 
O2A C14A H14A 110.5 . . ? 
C15A C14A H14A 110.5 . . ? 
O2A C14A H14B 110.5 . . ? 
C15A C14A H14B 110.5 . . ? 
H14A C14A H14B 108.7 . . ? 
O1A C13A O3A 125.1(9) . . ? 
O1A C13A O2A 126.5(9) . . ? 
O3A C13A O2A 108.4(8) . . ? 
O3A C16A C17A 110.1(8) . . ? 
O3A C16A H16A 109.6 . . ? 
C17A C16A H16A 109.6 . . ? 
O3A C16A H16B 109.6 . . ? 
C17A C16A H16B 109.6 . . ? 
H16A C16A H16B 108.2 . . ? 
C16A C17A H17A 109.5 . . ? 
C16A C17A H17B 109.5 . . ? 
H17A C17A H17B 109.5 . . ? 
C16A C17A H17C 109.5 . . ? 
H17A C17A H17C 109.5 . . ? 
H17B C17A H17C 109.5 . . ? 
C1B Hg1B Cl1B 176.8(3) . . ? 
C2B Hg2B Cl2B 178.0(3) . . ? 
C6B C1B C2B 117.8(9) . . ? 
C6B C1B Hg1B 117.8(7) . . ? 
C2B C1B Hg1B 124.3(7) . . ? 
C3B C2B C1B 118.9(9) . . ? 
C3B C2B Hg2B 115.8(7) . . ? 
C1B C2B Hg2B 125.0(7) . . ? 
F3B C3B C4B 116.2(9) . . ? 
F3B C3B C2B 121.3(9) . . ? 
C4B C3B C2B 122.5(9) . . ? 
F4B C4B C3B 122.6(10) . . ? 
F4B C4B C5B 118.3(10) . . ? 
C3B C4B C5B 119.1(9) . . ? 
F5B C5B C6B 120.3(9) . . ? 
F5B C5B C4B 121.2(9) . . ? 
C6B C5B C4B 118.5(9) . . ? 
F6B C6B C1B 119.2(9) . . ? 
F6B C6B C5B 117.7(9) . . ? 
C1B C6B C5B 123.1(9) . . ? 
O3B O1B O2B 132.9(6) . . ? 
O3B O1B C13B 69.29(11) . . ? 
O2B O1B C13B 69.14(11) . . ? 
O1B O2B C13B 56.89(8) . . ? 
O1B O2B C14B 156.3(10) . . ? 
C13B O2B C14B 108.05(13) . . ? 
O1B O2B O3B 107.0(3) . 3_776 ? 
C13B O2B O3B 52.22(6) . 3_776 ? 
C14B O2B O3B 55.86(7) . 3_776 ? 
O1B O2B H14D 132.1 . . ? 
C13B O2B H14D 129.3 . . ? 
O1B O3B C13B 57.14(8) . . ? 
O1B O3B C14B 158.9(9) . 3_776 ? 
C13B O3B C14B 108.17(13) . 3_776 ? 
O1B O3B O2B 107.4(3) . 3_776 ? 
C13B O3B O2B 52.36(6) . 3_776 ? 
C14B O3B O2B 55.84(7) 3_776 3_776 ? 
O1B C13B O1B 180.0(2) . 3_776 ? 
O1B C13B O3B 126.43(15) . 3_776 ? 
O1B C13B O3B 53.57(15) 3_776 3_776 ? 
O1B C13B O3B 53.57(15) . . ? 
O1B C13B O3B 126.43(15) 3_776 . ? 
O3B C13B O3B 180.000(4) 3_776 . ? 
O1B C13B O2B 53.98(15) . . ? 
O1B C13B O2B 126.02(15) 3_776 . ? 
O3B C13B O2B 75.42(10) 3_776 . ? 
O3B C13B O2B 104.58(10) . . ? 
O1B C13B O2B 126.02(15) . 3_776 ? 
O1B C13B O2B 53.98(15) 3_776 3_776 ? 
O3B C13B O2B 104.58(10) 3_776 3_776 ? 
O3B C13B O2B 75.42(10) . 3_776 ? 
O2B C13B O2B 180.000(3) . 3_776 ? 
O2B C14B O3B 68.30(12) . 3_776 ? 
O2B C14B C16B 159.0(13) . . ? 
O3B C14B C16B 101.1(10) 3_776 . ? 
O2B C14B C15B 109.9(11) . . ? 
O3B C14B C15B 172.5(14) 3_776 . ? 
C16B C14B C15B 78.2(12) . . ? 
O2B C14B H14G 109.9 . . ? 
O3B C14B H14G 77.4 3_776 . ? 
C16B C14B H14G 84.0 . . ? 
C15B C14B H14G 109.9 . . ? 
O2B C14B H14J 108.9 . . ? 
C15B C14B H14J 110.2 . . ? 
H14G C14B H14J 108.0 . . ? 
O3B C14B H14C 111.2 3_776 . ? 
C16B C14B H14C 113.8 . . ? 
C15B C14B H14C 75.7 . . ? 
H14G C14B H14C 51.8 . . ? 
H14J C14B H14C 158.6 . . ? 
O2B C14B H14D 60.8 . . ? 
O3B C14B H14D 111.2 3_776 . ? 
C16B C14B H14D 110.3 . . ? 
C15B C14B H14D 62.6 . . ? 
H14G C14B H14D 160.6 . . ? 
H14J C14B H14D 91.4 . . ? 
H14C C14B H14D 109.1 . . ? 
C14B C15B C16B 50.9(6) . . ? 
C16B C15B H14C 73.2 . . ? 
C16B C15B H14D 75.7 . . ? 
H14C C15B H14D 63.8 . . ? 
C14B C15B H15G 108.0 . . ? 
C16B C15B H15G 60.0 . . ? 
H14C C15B H15G 109.8 . . ? 
H14D C15B H15G 134.1 . . ? 
C14B C15B H15H 110.4 . . ? 
C16B C15B H15H 140.4 . . ? 
H14C C15B H15H 76.3 . . ? 
H14D C15B H15H 112.2 . . ? 
H15G C15B H15H 109.5 . . ? 
C14B C15B H15I 110.0 . . ? 
C16B C15B H15I 110.0 . . ? 
H14C C15B H15I 135.2 . . ? 
H14D C15B H15I 73.7 . . ? 
H15G C15B H15I 109.4 . . ? 
H15H C15B H15I 109.5 . . ? 
C14B C16B C15B 50.9(6) . . ? 
C15B C16B H14J 79.9 . . ? 
C14B C16B H16C 107.8 . . ? 
C15B C16B H16C 57.3 . . ? 
H14J C16B H16C 132.7 . . ? 
C14B C16B H16D 112.1 . . ? 
C15B C16B H16D 120.9 . . ? 
H14J C16B H16D 74.0 . . ? 
H16C C16B H16D 109.5 . . ? 
C14B C16B H16E 108.5 . . ? 
C15B C16B H16E 129.6 . . ? 
H14J C16B H16E 113.4 . . ? 
H16C C16B H16E 109.5 . . ? 
H16D C16B H16E 109.5 . . ? 
 
loop_ 
 _geom_torsion_atom_site_label_1 
 _geom_torsion_atom_site_label_2 
 _geom_torsion_atom_site_label_3 
 _geom_torsion_atom_site_label_4 
 _geom_torsion 
 _geom_torsion_site_symmetry_1 
 _geom_torsion_site_symmetry_2 
 _geom_torsion_site_symmetry_3 
 _geom_torsion_site_symmetry_4 
 _geom_torsion_publ_flag 
C6A C1A C2A C3A 3.4(14) . . . . ? 
Hg1A C1A C2A C3A -179.4(7) . . . . ? 
C6A C1A C2A Hg2A -175.7(7) . . . . ? 
Hg1A C1A C2A Hg2A 1.5(12) . . . . ? 
C1A C2A C3A F3A 177.2(8) . . . . ? 
Hg2A C2A C3A F3A -3.6(12) . . . . ? 
C1A C2A C3A C4A -0.2(15) . . . . ? 
Hg2A C2A C3A C4A 178.9(9) . . . . ? 
F3A C3A C4A C5A 178.6(11) . . . . ? 
C2A C3A C4A C5A -3.9(18) . . . . ? 
F3A C3A C4A F4A 3.0(16) . . . . ? 
C2A C3A C4A F4A -179.5(10) . . . . ? 
F4A C4A C5A F5A -3.6(19) . . . . ? 
C3A C4A C5A F5A -179.2(11) . . . . ? 
F4A C4A C5A C6A -179.8(11) . . . . ? 
C3A C4A C5A C6A 4.6(19) . . . . ? 
F5A C5A C6A F6A 0.5(17) . . . . ? 
C4A C5A C6A F6A 176.8(11) . . . . ? 
F5A C5A C6A C1A -177.7(10) . . . . ? 
C4A C5A C6A C1A -1.4(18) . . . . ? 
C2A C1A C6A F6A 179.1(9) . . . . ? 
Hg1A C1A C6A F6A 1.7(13) . . . . ? 
C2A C1A C6A C5A -2.7(16) . . . . ? 
Hg1A C1A C6A C5A 179.9(9) . . . . ? 
C12A C7A C8A C9A -2.1(13) . . . . ? 
Hg3A C7A C8A C9A 179.4(6) . . . . ? 
C12A C7A C8A Hg4A 177.9(7) . . . . ? 
Hg3A C7A C8A Hg4A -0.7(11) . . . . ? 
C7A C8A C9A C10A 1.8(14) . . . . ? 
Hg4A C8A C9A C10A -178.1(8) . . . . ? 
C7A C8A C9A F9A 179.9(8) . . . . ? 
Hg4A C8A C9A F9A 0.0(11) . . . . ? 
F9A C9A C10A F10A -0.6(14) . . . . ? 
C8A C9A C10A F10A 177.5(9) . . . . ? 
F9A C9A C10A C11A -178.3(9) . . . . ? 
C8A C9A C10A C11A -0.1(16) . . . . ? 
F10A C10A C11A F11A 1.9(15) . . . . ? 
C9A C10A C11A F11A 179.5(9) . . . . ? 
F10A C10A C11A C12A -178.9(9) . . . . ? 
C9A C10A C11A C12A -1.3(15) . . . . ? 
C8A C7A C12A F12A -179.9(8) . . . . ? 
Hg3A C7A C12A F12A -1.3(12) . . . . ? 
C8A C7A C12A C11A 0.8(14) . . . . ? 
Hg3A C7A C12A C11A 179.4(8) . . . . ? 
F11A C11A C12A F12A 0.7(14) . . . . ? 
C10A C11A C12A F12A -178.5(9) . . . . ? 
F11A C11A C12A C7A -179.9(9) . . . . ? 
C10A C11A C12A C7A 0.9(16) . . . . ? 
C13A O2A C14A C15A -179.6(9) . . . . ? 
C16A O3A C13A O1A -2.0(14) . . . . ? 
C16A O3A C13A O2A 178.5(7) . . . . ? 
C14A O2A C13A O1A 2.9(14) . . . . ? 
C14A O2A C13A O3A -177.7(8) . . . . ? 
C13A O3A C16A C17A 160.2(9) . . . . ? 
C6B C1B C2B C3B -3.2(14) . . . . ? 
Hg1B C1B C2B C3B -179.6(7) . . . . ? 
C6B C1B C2B Hg2B -177.1(7) . . . . ? 
Hg1B C1B C2B Hg2B 6.5(12) . . . . ? 
C1B C2B C3B F3B 179.7(8) . . . . ? 
Hg2B C2B C3B F3B -6.0(12) . . . . ? 
C1B C2B C3B C4B 2.4(15) . . . . ? 
Hg2B C2B C3B C4B 176.8(8) . . . . ? 
F3B C3B C4B F4B 0.4(15) . . . . ? 
C2B C3B C4B F4B 177.7(9) . . . . ? 
F3B C3B C4B C5B -178.0(9) . . . . ? 
C2B C3B C4B C5B -0.6(16) . . . . ? 
F4B C4B C5B F5B 2.5(15) . . . . ? 
C3B C4B C5B F5B -179.1(9) . . . . ? 
F4B C4B C5B C6B -178.7(9) . . . . ? 
C3B C4B C5B C6B -0.3(15) . . . . ? 
C2B C1B C6B F6B -179.5(8) . . . . ? 
Hg1B C1B C6B F6B -2.8(12) . . . . ? 
C2B C1B C6B C5B 2.4(15) . . . . ? 
Hg1B C1B C6B C5B 179.0(8) . . . . ? 
F5B C5B C6B F6B 0.0(15) . . . . ? 
C4B C5B C6B F6B -178.8(9) . . . . ? 
F5B C5B C6B C1B 178.1(9) . . . . ? 
C4B C5B C6B C1B -0.6(16) . . . . ? 
O3B O1B O2B C13B -29.3(10) . . . . ? 
O3B O1B O2B O3B -44.6(16) . . . 3_776 ? 
C13B O1B O2B O3B -15.3(6) . . . 3_776 ? 
O2B O1B O3B C13B 29.3(10) . . . . ? 
O2B O1B O3B O2B 44.7(16) . . . 3_776 ? 
C13B O1B O3B O2B 15.4(6) . . . 3_776 ? 
O2B O1B C13B O3B 22.6(9) . . . 3_776 ? 
O2B O1B C13B O3B -157.4(9) . . . . ? 
O3B O1B C13B O2B 157.4(9) . . . . ? 
O3B O1B C13B O2B -22.6(9) . . . 3_776 ? 
C14B O3B C13B O1B -163.1(13) 3_776 . . . ? 
O2B O3B C13B O1B -161.3(8) 3_776 . . . ? 
O1B O3B C13B O1B 180.000(2) . . . 3_776 ? 
C14B O3B C13B O1B 16.9(13) 3_776 . . 3_776 ? 
O2B O3B C13B O1B 18.7(8) 3_776 . . 3_776 ? 
O1B O3B C13B O2B -18.7(8) . . . . ? 
C14B O3B C13B O2B 178.2(10) 3_776 . . . ? 
O2B O3B C13B O2B 180.000(4) 3_776 . . . ? 
O1B O3B C13B O2B 161.3(8) . . . 3_776 ? 
C14B O3B C13B O2B -1.8(10) 3_776 . . 3_776 ? 
C14B O2B C13B O1B 159.6(13) . . . . ? 
O3B O2B C13B O1B 161.4(8) 3_776 . . . ? 
C14B O2B C13B O1B -20.4(13) . . . 3_776 ? 
O3B O2B C13B O1B -18.6(8) 3_776 . . 3_776 ? 
O1B O2B C13B O3B -161.4(8) . . . 3_776 ? 
C14B O2B C13B O3B -1.8(10) . . . 3_776 ? 
O1B O2B C13B O3B 18.6(8) . . . . ? 
C14B O2B C13B O3B 178.2(10) . . . . ? 
O3B O2B C13B O3B 180.000(4) 3_776 . . . ? 
C13B O2B C14B O3B 1.8(10) . . . 3_776 ? 
C13B O2B C14B C15B -170.5(12) . . . . ? 
O3B O2B C14B C15B -172.2(14) 3_776 . . . ? 
O2B C14B C15B C16B 159.8(15) . . . . ? 
O2B C14B C16B C15B -115(3) . . . . ? 
O3B C14B C16B C15B -172.4(14) 3_776 . . . ? 
 
_diffrn_measured_fraction_theta_max    0.998 
_diffrn_reflns_theta_full              29.00 
_diffrn_measured_fraction_theta_full   0.998 
_refine_diff_density_max    1.931 
_refine_diff_density_min   -2.288 
_refine_diff_density_rms    0.238 

 
data_II3 
 
_audit_creation_method            SHELXL-97 
_chemical_name_systematic 
; 
 ? 
; 
_chemical_name_common             ? 
_chemical_melting_point           ? 
_chemical_formula_moiety          ? 
_chemical_formula_sum 
 'C14 H8 Cl2 F4 Hg2 O2' 
_chemical_formula_weight          756.28 
 
loop_ 
 _atom_type_symbol 
 _atom_type_description 
 _atom_type_scat_dispersion_real 
 _atom_type_scat_dispersion_imag 
 _atom_type_scat_source 
 'C'  'C'   0.0033   0.0016 
 'International Tables Vol C Tables 4.2.6.8 and 6.1.1.4' 
 'H'  'H'   0.0000   0.0000 
 'International Tables Vol C Tables 4.2.6.8 and 6.1.1.4' 
 'O'  'O'   0.0106   0.0060 
 'International Tables Vol C Tables 4.2.6.8 and 6.1.1.4' 
 'F'  'F'   0.0171   0.0103 
 'International Tables Vol C Tables 4.2.6.8 and 6.1.1.4' 
 'Cl'  'Cl'   0.1484   0.1585 
 'International Tables Vol C Tables 4.2.6.8 and 6.1.1.4' 
 'Hg'  'Hg'  -2.3894   9.2266 
 'International Tables Vol C Tables 4.2.6.8 and 6.1.1.4' 
 
_symmetry_cell_setting            Monoclinic 
_symmetry_space_group_name_H-M    'C c' 
 
loop_ 
 _symmetry_equiv_pos_as_xyz 
 'x, y, z' 
 'x, -y, z+1/2' 
 'x+1/2, y+1/2, z' 
 'x+1/2, -y+1/2, z+1/2' 
 
_cell_length_a                    16.4902(18) 
_cell_length_b                    15.8412(17) 
_cell_length_c                    6.7903(7) 
_cell_angle_alpha                 90.00 
_cell_angle_beta                  111.6420(10) 
_cell_angle_gamma                 90.00 
_cell_volume                      1648.8(3) 
_cell_formula_units_Z             4 
_cell_measurement_temperature     100(2) 
_cell_measurement_reflns_used     6664 
_cell_measurement_theta_min       2.66 
_cell_measurement_theta_max       30.76 
 
_exptl_crystal_description        needle 
_exptl_crystal_colour             colorless 
_exptl_crystal_size_max           0.60 
_exptl_crystal_size_mid           0.05 
_exptl_crystal_size_min           0.01 
_exptl_crystal_density_meas       'not measured' 
_exptl_crystal_density_diffrn     3.047 
_exptl_crystal_density_method     'not measured' 
_exptl_crystal_F_000              1352 
_exptl_absorpt_coefficient_mu     18.970 
_exptl_absorpt_correction_type    'multi-scan'
_exptl_absorpt_correction_T_min   0.0310 
_exptl_absorpt_correction_T_max   0.8330 
_exptl_absorpt_process_details    'SADABS (Sheldrick, 2003)' 
 
_exptl_special_details 
; 
 ? 
; 
 
_diffrn_ambient_temperature       100(2) 
_diffrn_radiation_wavelength      0.71073 
_diffrn_radiation_type            MoK\a 
_diffrn_radiation_source          'fine-focus sealed tube' 
_diffrn_radiation_monochromator   graphite 
_diffrn_measurement_device_type   'Bruker SMART APEX II CCD area detector'
_diffrn_measurement_method        'phi and omega scans'
_diffrn_detector_area_resol_mean  ? 
_diffrn_standards_number          ? 
_diffrn_standards_interval_count  ? 
_diffrn_standards_interval_time   ? 
_diffrn_standards_decay_%         ? 
_diffrn_reflns_number             10406 
_diffrn_reflns_av_R_equivalents   0.0300 
_diffrn_reflns_av_sigmaI/netI     0.0465 
_diffrn_reflns_limit_h_min        -21 
_diffrn_reflns_limit_h_max        21 
_diffrn_reflns_limit_k_min        -20 
_diffrn_reflns_limit_k_max        20 
_diffrn_reflns_limit_l_min        -8 
_diffrn_reflns_limit_l_max        8 
_diffrn_reflns_theta_min          1.85 
_diffrn_reflns_theta_max          28.00 
_reflns_number_total              3917 
_reflns_number_gt                 3706 
_reflns_threshold_expression      'I>2\s(I)'
 
_computing_data_collection        'APEX2  (Bruker, 2005)' 
_computing_cell_refinement        'SAINT+ ver. 6.2 (Bruker, 2001)' 
_computing_data_reduction         'SAINT+ ver. 6.2 (Bruker, 2001)' 
_computing_structure_solution     'SHELXTL ver. 6.12 (Sheldrick, 2001)' 
_computing_structure_refinement   'SHELXTL ver. 6.12 (Sheldrick, 2001)' 
_computing_molecular_graphics     'SHELXTL ver. 6.12 (Sheldrick, 2001)' 
_computing_publication_material   'SHELXTL ver. 6.12 (Sheldrick, 2001)' 

 
_refine_special_details 
; 
 Refinement of F^2^ against ALL reflections.  The weighted R-factor wR and 
 goodness of fit S are based on F^2^, conventional R-factors R are based 
 on F, with F set to zero for negative F^2^. The threshold expression of 
 F^2^ > 2sigma(F^2^) is used only for calculating R-factors(gt) etc. and is 
 not relevant to the choice of reflections for refinement.  R-factors based 
 on F^2^ are statistically about twice as large as those based on F, and R- 
 factors based on ALL data will be even larger. 
; 
 
_refine_ls_structure_factor_coef  Fsqd  
_refine_ls_matrix_type            full 
_refine_ls_weighting_scheme       calc  
_refine_ls_weighting_details 
 'calc w=1/[\s^2^(Fo^2^)+(0.0210P)^2^+0.0000P] where P=(Fo^2^+2Fc^2^)/3' 
_atom_sites_solution_primary      direct 
_atom_sites_solution_secondary    difmap 
_atom_sites_solution_hydrogens    geom 
_refine_ls_hydrogen_treatment     constr 
_refine_ls_extinction_method      none 
_refine_ls_extinction_coef        ? 
_refine_ls_abs_structure_details 
 'Flack H D (1983), Acta Cryst. A39, 876-881' 
_refine_ls_abs_structure_Flack    0.015(9) 
_refine_ls_number_reflns          3917 
_refine_ls_number_parameters      219 
_refine_ls_number_restraints      2 
_refine_ls_R_factor_all           0.0291 
_refine_ls_R_factor_gt            0.0261 
_refine_ls_wR_factor_ref          0.0571 
_refine_ls_wR_factor_gt           0.0558 
_refine_ls_goodness_of_fit_ref    1.026 
_refine_ls_restrained_S_all       1.026 
_refine_ls_shift/su_max           0.001 
_refine_ls_shift/su_mean          0.000 
 
loop_ 
 _atom_site_label 
 _atom_site_type_symbol 
 _atom_site_fract_x 
 _atom_site_fract_y 
 _atom_site_fract_z 
 _atom_site_U_iso_or_equiv 
 _atom_site_adp_type 
 _atom_site_occupancy 
 _atom_site_symmetry_multiplicity 
 _atom_site_calc_flag 
 _atom_site_refinement_flags 
 _atom_site_disorder_assembly 
 _atom_site_disorder_group 
Hg1 Hg 0.060781(19) -0.648038(18) -1.95111(3) 0.02382(7) Uani 1 1 d . . . 
Hg2 Hg -0.06226(2) -0.577945(17) -2.50160(3) 0.02291(7) Uani 1 1 d . . . 
Cl1 Cl 0.09445(12) -0.54613(13) -1.6861(3) 0.0263(4) Uani 1 1 d . . . 
Cl2 Cl -0.12116(12) -0.44494(13) -2.6151(3) 0.0253(4) Uani 1 1 d . . . 
F3 F -0.0886(3) -0.7325(3) -2.7826(7) 0.0326(11) Uani 1 1 d . . . 
F4 F -0.0622(3) -0.8997(3) -2.7045(7) 0.0360(12) Uani 1 1 d . . . 
F5 F 0.0195(4) -0.9560(3) -2.3007(8) 0.0389(12) Uani 1 1 d . . . 
F6 F 0.0729(3) -0.8462(3) -1.9761(7) 0.0367(12) Uani 1 1 d . . . 
O1 O 0.1606(4) -0.7602(5) -1.5375(10) 0.0460(17) Uani 1 1 d . . . 
O2 O 0.2137(4) -0.8704(5) -1.3208(10) 0.0435(16) Uani 1 1 d . . . 
C1 C 0.0206(5) -0.7302(5) -2.2071(11) 0.0220(15) Uani 1 1 d . . . 
C2 C -0.0241(5) -0.6995(5) -2.4138(12) 0.0232(15) Uani 1 1 d . . . 
C3 C -0.0480(5) -0.7581(5) -2.5798(11) 0.0241(16) Uani 1 1 d . . . 
C4 C -0.0345(5) -0.8441(5) -2.5444(13) 0.0295(18) Uani 1 1 d . . . 
C5 C 0.0056(5) -0.8735(5) -2.3400(13) 0.0260(16) Uani 1 1 d . . . 
C6 C 0.0338(5) -0.8142(5) -2.1717(12) 0.0271(16) Uani 1 1 d . . . 
C7 C 0.2349(5) -0.7371(6) -1.1601(14) 0.0313(18) Uani 1 1 d . . . 
C8 C 0.2617(6) -0.7735(8) -0.9601(15) 0.045(3) Uani 1 1 d . . . 
H8A H 0.2590 -0.8330 -0.9457 0.054 Uiso 1 1 calc R . . 
C9 C 0.2910(6) -0.7247(7) -0.7893(16) 0.041(2) Uani 1 1 d . . . 
H9A H 0.3088 -0.7496 -0.6526 0.049 Uiso 1 1 calc R . . 
C10 C 0.2958(7) -0.6404(8) -0.8072(16) 0.051(3) Uani 1 1 d . . . 
H10A H 0.3195 -0.6078 -0.6815 0.061 Uiso 1 1 calc R . . 
C11 C 0.2678(6) -0.5993(7) -0.9995(18) 0.046(2) Uani 1 1 d . . . 
H11A H 0.2692 -0.5395 -1.0079 0.055 Uiso 1 1 calc R . . 
C12 C 0.2363(6) -0.6507(7) -1.1868(16) 0.044(3) Uani 1 1 d . . . 
H12A H 0.2171 -0.6262 -1.3241 0.053 Uiso 1 1 calc R . . 
C13 C 0.1978(6) -0.7914(7) -1.3648(13) 0.040(2) Uani 1 1 d . . . 
C14 C 0.1807(7) -0.9250(6) -1.5083(15) 0.042(2) Uani 1 1 d . . . 
H14D H 0.2010 -0.9829 -1.4687 0.062 Uiso 1 1 calc R . . 
H14A H 0.2023 -0.9045 -1.6162 0.062 Uiso 1 1 calc R . . 
H14B H 0.1168 -0.9239 -1.5653 0.062 Uiso 1 1 calc R . . 
 
loop_ 
 _atom_site_aniso_label 
 _atom_site_aniso_U_11 
 _atom_site_aniso_U_22 
 _atom_site_aniso_U_33 
 _atom_site_aniso_U_23 
 _atom_site_aniso_U_13 
 _atom_site_aniso_U_12 
Hg1 0.02566(14) 0.02959(17) 0.01729(12) -0.00242(12) 0.00919(10) -0.00122(13) 
Hg2 0.02721(14) 0.02415(15) 0.01885(13) 0.00057(11) 0.01021(10) 0.00061(12) 
Cl1 0.0309(10) 0.0308(10) 0.0170(8) -0.0026(7) 0.0086(7) -0.0009(8) 
Cl2 0.0281(9) 0.0278(10) 0.0223(8) 0.0041(7) 0.0119(7) 0.0026(7) 
F3 0.040(3) 0.035(3) 0.020(2) -0.0001(19) 0.0081(19) 0.003(2) 
F4 0.049(3) 0.032(3) 0.026(2) -0.011(2) 0.013(2) -0.005(2) 
F5 0.050(3) 0.025(3) 0.041(3) 0.002(2) 0.016(2) 0.000(2) 
F6 0.044(3) 0.043(3) 0.019(2) 0.0087(19) 0.007(2) 0.001(2) 
O1 0.047(4) 0.057(5) 0.030(3) 0.008(3) 0.010(3) -0.002(3) 
O2 0.046(4) 0.051(4) 0.031(3) 0.000(3) 0.012(3) 0.008(3) 
C1 0.027(4) 0.020(4) 0.023(3) -0.007(3) 0.013(3) -0.006(3) 
C2 0.030(4) 0.018(4) 0.019(3) -0.001(3) 0.006(3) 0.002(3) 
C3 0.027(4) 0.036(5) 0.013(3) 0.003(3) 0.012(3) 0.002(3) 
C4 0.029(4) 0.039(5) 0.023(4) -0.006(3) 0.013(3) -0.003(3) 
C5 0.033(4) 0.018(4) 0.027(4) 0.000(3) 0.012(3) 0.005(3) 
C6 0.024(4) 0.032(5) 0.025(4) 0.005(3) 0.008(3) -0.003(3) 
C7 0.025(4) 0.037(5) 0.036(4) -0.001(4) 0.016(3) -0.001(3) 
C8 0.029(5) 0.072(8) 0.035(5) 0.011(5) 0.013(4) 0.017(5) 
C9 0.038(5) 0.048(6) 0.040(5) 0.009(4) 0.017(4) 0.011(4) 
C10 0.035(5) 0.081(9) 0.029(5) -0.013(5) 0.004(4) 0.012(5) 
C11 0.026(4) 0.045(6) 0.059(6) 0.005(5) 0.007(4) 0.005(4) 
C12 0.025(4) 0.071(8) 0.036(5) 0.022(5) 0.011(4) 0.010(4) 
C13 0.029(4) 0.065(7) 0.025(4) 0.018(4) 0.009(3) 0.004(4) 
C14 0.044(5) 0.042(6) 0.036(5) -0.005(4) 0.012(4) 0.006(4) 
 
_geom_special_details 
; 
 All esds (except the esd in the dihedral angle between two l.s. planes) 
 are estimated using the full covariance matrix.  The cell esds are taken 
 into account individually in the estimation of esds in distances, angles 
 and torsion angles; correlations between esds in cell parameters are only 
 used when they are defined by crystal symmetry.  An approximate (isotropic) 
 treatment of cell esds is used for estimating esds involving l.s. planes. 
; 
 
loop_ 
 _geom_bond_atom_site_label_1 
 _geom_bond_atom_site_label_2 
 _geom_bond_distance 
 _geom_bond_site_symmetry_2 
 _geom_bond_publ_flag 
Hg1 C1 2.075(7) . ? 
Hg1 Cl1 2.3273(19) . ? 
Hg2 C2 2.046(8) . ? 
Hg2 Cl2 2.329(2) . ? 
F3 C3 1.353(8) . ? 
F4 C4 1.342(9) . ? 
F5 C5 1.336(9) . ? 
F6 C6 1.344(9) . ? 
O1 C13 1.210(10) . ? 
O2 C13 1.291(12) . ? 
O2 C14 1.467(11) . ? 
C1 C6 1.355(11) . ? 
C1 C2 1.409(10) . ? 
C2 C3 1.400(11) . ? 
C3 C4 1.386(12) . ? 
C4 C5 1.380(11) . ? 
C5 C6 1.419(12) . ? 
C7 C12 1.381(13) . ? 
C7 C8 1.389(13) . ? 
C7 C13 1.556(13) . ? 
C8 C9 1.328(15) . ? 
C8 H8A 0.9500 . ? 
C9 C10 1.346(15) . ? 
C9 H9A 0.9500 . ? 
C10 C11 1.377(15) . ? 
C10 H10A 0.9500 . ? 
C11 C12 1.436(16) . ? 
C11 H11A 0.9500 . ? 
C12 H12A 0.9500 . ? 
C14 H14D 0.9800 . ? 
C14 H14A 0.9800 . ? 
C14 H14B 0.9800 . ? 
 
loop_ 
 _geom_angle_atom_site_label_1 
 _geom_angle_atom_site_label_2 
 _geom_angle_atom_site_label_3 
 _geom_angle 
 _geom_angle_site_symmetry_1 
 _geom_angle_site_symmetry_3 
 _geom_angle_publ_flag 
C1 Hg1 Cl1 173.9(2) . . ? 
C2 Hg2 Cl2 173.8(2) . . ? 
C13 O2 C14 113.0(7) . . ? 
C6 C1 C2 120.4(7) . . ? 
C6 C1 Hg1 119.1(6) . . ? 
C2 C1 Hg1 120.4(6) . . ? 
C3 C2 C1 117.5(7) . . ? 
C3 C2 Hg2 115.1(5) . . ? 
C1 C2 Hg2 127.4(5) . . ? 
F3 C3 C4 117.4(7) . . ? 
F3 C3 C2 120.5(7) . . ? 
C4 C3 C2 122.1(7) . . ? 
F4 C4 C5 119.1(7) . . ? 
F4 C4 C3 121.3(7) . . ? 
C5 C4 C3 119.6(7) . . ? 
F5 C5 C4 121.0(7) . . ? 
F5 C5 C6 120.4(7) . . ? 
C4 C5 C6 118.7(7) . . ? 
F6 C6 C1 122.2(7) . . ? 
F6 C6 C5 116.2(7) . . ? 
C1 C6 C5 121.6(7) . . ? 
C12 C7 C8 121.7(9) . . ? 
C12 C7 C13 116.8(8) . . ? 
C8 C7 C13 121.5(9) . . ? 
C9 C8 C7 119.6(11) . . ? 
C9 C8 H8A 120.2 . . ? 
C7 C8 H8A 120.2 . . ? 
C8 C9 C10 120.9(10) . . ? 
C8 C9 H9A 119.6 . . ? 
C10 C9 H9A 119.6 . . ? 
C9 C10 C11 123.0(10) . . ? 
C9 C10 H10A 118.5 . . ? 
C11 C10 H10A 118.5 . . ? 
C10 C11 C12 117.2(10) . . ? 
C10 C11 H11A 121.4 . . ? 
C12 C11 H11A 121.4 . . ? 
C7 C12 C11 117.6(9) . . ? 
C7 C12 H12A 121.2 . . ? 
C11 C12 H12A 121.2 . . ? 
O1 C13 O2 127.4(10) . . ? 
O1 C13 C7 122.1(10) . . ? 
O2 C13 C7 110.5(7) . . ? 
O2 C14 H14D 109.5 . . ? 
O2 C14 H14A 109.5 . . ? 
H14D C14 H14A 109.5 . . ? 
O2 C14 H14B 109.5 . . ? 
H14D C14 H14B 109.5 . . ? 
H14A C14 H14B 109.5 . . ? 
 
loop_ 
 _geom_torsion_atom_site_label_1 
 _geom_torsion_atom_site_label_2 
 _geom_torsion_atom_site_label_3 
 _geom_torsion_atom_site_label_4 
 _geom_torsion 
 _geom_torsion_site_symmetry_1 
 _geom_torsion_site_symmetry_2 
 _geom_torsion_site_symmetry_3 
 _geom_torsion_site_symmetry_4 
 _geom_torsion_publ_flag 
Cl1 Hg1 C1 C6 -153.9(17) . . . . ? 
Cl1 Hg1 C1 C2 23(2) . . . . ? 
C6 C1 C2 C3 -4.5(12) . . . . ? 
Hg1 C1 C2 C3 178.9(6) . . . . ? 
C6 C1 C2 Hg2 173.4(6) . . . . ? 
Hg1 C1 C2 Hg2 -3.2(10) . . . . ? 
Cl2 Hg2 C2 C3 61(2) . . . . ? 
Cl2 Hg2 C2 C1 -117.4(18) . . . . ? 
C1 C2 C3 F3 -178.0(7) . . . . ? 
Hg2 C2 C3 F3 3.8(9) . . . . ? 
C1 C2 C3 C4 4.6(12) . . . . ? 
Hg2 C2 C3 C4 -173.6(6) . . . . ? 
F3 C3 C4 F4 -1.3(12) . . . . ? 
C2 C3 C4 F4 176.2(7) . . . . ? 
F3 C3 C4 C5 -179.1(7) . . . . ? 
C2 C3 C4 C5 -1.6(13) . . . . ? 
F4 C4 C5 F5 2.2(12) . . . . ? 
C3 C4 C5 F5 -180.0(7) . . . . ? 
F4 C4 C5 C6 -179.4(8) . . . . ? 
C3 C4 C5 C6 -1.5(13) . . . . ? 
C2 C1 C6 F6 -177.2(7) . . . . ? 
Hg1 C1 C6 F6 -0.6(11) . . . . ? 
C2 C1 C6 C5 1.6(13) . . . . ? 
Hg1 C1 C6 C5 178.2(6) . . . . ? 
F5 C5 C6 F6 -1.1(12) . . . . ? 
C4 C5 C6 F6 -179.6(7) . . . . ? 
F5 C5 C6 C1 180.0(7) . . . . ? 
C4 C5 C6 C1 1.5(13) . . . . ? 
C12 C7 C8 C9 -1.4(14) . . . . ? 
C13 C7 C8 C9 -178.3(8) . . . . ? 
C7 C8 C9 C10 -0.5(15) . . . . ? 
C8 C9 C10 C11 2.8(16) . . . . ? 
C9 C10 C11 C12 -3.1(15) . . . . ? 
C8 C7 C12 C11 1.0(13) . . . . ? 
C13 C7 C12 C11 178.1(8) . . . . ? 
C10 C11 C12 C7 1.2(13) . . . . ? 
C14 O2 C13 O1 -0.5(14) . . . . ? 
C14 O2 C13 C7 -179.6(7) . . . . ? 
C12 C7 C13 O1 -10.1(13) . . . . ? 
C8 C7 C13 O1 167.0(8) . . . . ? 
C12 C7 C13 O2 169.1(8) . . . . ? 
C8 C7 C13 O2 -13.8(12) . . . . ? 
 
_diffrn_measured_fraction_theta_max    0.997 
_diffrn_reflns_theta_full              28.00 
_diffrn_measured_fraction_theta_full   0.997 
_refine_diff_density_max    1.592 
_refine_diff_density_min   -1.710 
_refine_diff_density_rms    0.197 


 
data_II4 
 
_audit_creation_method            SHELXL-97 
_chemical_name_systematic 
; 
 ? 
; 
_chemical_name_common             ? 
_chemical_melting_point           ? 
_chemical_formula_moiety          
'C8 H8 O2, C6 Cl2 F4 Hg2' 
_chemical_formula_sum 
 'C14 H8 Cl2 F4 Hg2 O2' 
_chemical_formula_weight          756.28 
 
loop_ 
 _atom_type_symbol 
 _atom_type_description 
 _atom_type_scat_dispersion_real 
 _atom_type_scat_dispersion_imag 
 _atom_type_scat_source 
 'C'  'C'   0.0033   0.0016 
 'International Tables Vol C Tables 4.2.6.8 and 6.1.1.4' 
 'H'  'H'   0.0000   0.0000 
 'International Tables Vol C Tables 4.2.6.8 and 6.1.1.4' 
 'O'  'O'   0.0106   0.0060 
 'International Tables Vol C Tables 4.2.6.8 and 6.1.1.4' 
 'F'  'F'   0.0171   0.0103 
 'International Tables Vol C Tables 4.2.6.8 and 6.1.1.4' 
 'Cl'  'Cl'   0.1484   0.1585 
 'International Tables Vol C Tables 4.2.6.8 and 6.1.1.4' 
 'Hg'  'Hg'  -2.3894   9.2266 
 'International Tables Vol C Tables 4.2.6.8 and 6.1.1.4' 
 
_symmetry_cell_setting            Triclinic 
_symmetry_space_group_name_H-M    'P - 1' 
_symmetry_space_group_name_Hall   '-P 1'
loop_ 
 _symmetry_equiv_pos_as_xyz 
 'x, y, z' 
 '-x, -y, -z' 
 
_cell_length_a                    7.024(5) 
_cell_length_b                    7.837(5) 
_cell_length_c                    31.10(2) 
_cell_angle_alpha                 88.446(7) 
_cell_angle_beta                  88.373(6) 
_cell_angle_gamma                 89.507(7) 
_cell_volume                      1711(2) 
_cell_formula_units_Z             4 
_cell_measurement_temperature     100(2) 
_cell_measurement_reflns_used     2976 
_cell_measurement_theta_min       2.60 
_cell_measurement_theta_max       25.00 
 
_exptl_crystal_description        plate 
_exptl_crystal_colour             colorless 
_exptl_crystal_size_max           0.50 
_exptl_crystal_size_mid           0.40 
_exptl_crystal_size_min           0.10 
_exptl_crystal_density_meas       'not measured' 
_exptl_crystal_density_diffrn     2.937 
_exptl_crystal_density_method     'not measured' 
_exptl_crystal_F_000              1352 
_exptl_absorpt_coefficient_mu     18.284 
_exptl_absorpt_correction_type    'numerical' 
_exptl_absorpt_correction_T_min   0.0395 
_exptl_absorpt_correction_T_max   0.2622 
_exptl_absorpt_process_details    'APEX2  (Bruker, 2005)' 
 
_exptl_special_details 
; 
 ? 
; 
 
_diffrn_ambient_temperature       100(2) 
_diffrn_radiation_wavelength      0.71073 
_diffrn_radiation_type            MoK\a 
_diffrn_radiation_source          'fine-focus sealed tube' 
_diffrn_radiation_monochromator   graphite 
_diffrn_measurement_device_type   'Bruker SMART APEX II CCD area detector'
_diffrn_measurement_method        'phi and omega scans'
_diffrn_detector_area_resol_mean  ? 
_diffrn_standards_number          ? 
_diffrn_standards_interval_count  ? 
_diffrn_standards_interval_time   ? 
_diffrn_standards_decay_%         ? 
_diffrn_reflns_number             12729 
_diffrn_reflns_av_R_equivalents   0.0692 
_diffrn_reflns_av_sigmaI/netI     0.1099 
_diffrn_reflns_limit_h_min        -8 
_diffrn_reflns_limit_h_max        8 
_diffrn_reflns_limit_k_min        -9 
_diffrn_reflns_limit_k_max        9 
_diffrn_reflns_limit_l_min        -37 
_diffrn_reflns_limit_l_max        38 
_diffrn_reflns_theta_min          0.66 
_diffrn_reflns_theta_max          26.00 
_reflns_number_total              6457 
_reflns_number_gt                 5012 
_reflns_threshold_expression      'I>2\s(I)'
 
_computing_data_collection        'APEX2  (Bruker, 2005)' 
_computing_cell_refinement        'SAINT+ ver. 6.2 (Bruker, 2001)' 
_computing_data_reduction         'SAINT+ ver. 6.2 (Bruker, 2001)' 
_computing_structure_solution     'SHELXTL ver. 6.12 (Sheldrick, 2001)' 
_computing_structure_refinement   'SHELXTL ver. 6.12 (Sheldrick, 2001)' 
_computing_molecular_graphics     'SHELXTL ver. 6.12 (Sheldrick, 2001)' 
_computing_publication_material   'SHELXTL ver. 6.12 (Sheldrick, 2001)' 

 
_refine_special_details 
; 
 Refinement of F^2^ against ALL reflections.  The weighted R-factor wR and 
 goodness of fit S are based on F^2^, conventional R-factors R are based 
 on F, with F set to zero for negative F^2^. The threshold expression of 
 F^2^ > 2sigma(F^2^) is used only for calculating R-factors(gt) etc. and is 
 not relevant to the choice of reflections for refinement.  R-factors based 
 on F^2^ are statistically about twice as large as those based on F, and R- 
 factors based on ALL data will be even larger. 
; 
 
_refine_ls_structure_factor_coef  Fsqd  
_refine_ls_matrix_type            full 
_refine_ls_weighting_scheme       calc  
_refine_ls_weighting_details 
 'calc w=1/[\s^2^(Fo^2^)+(0.0300P)^2^+700.0000P] where P=(Fo^2^+2Fc^2^)/3' 
_atom_sites_solution_primary      direct 
_atom_sites_solution_secondary    difmap 
_atom_sites_solution_hydrogens    geom 
_refine_ls_hydrogen_treatment     constr 
_refine_ls_extinction_method      none 
_refine_ls_extinction_coef        ? 
_refine_ls_number_reflns          6457 
_refine_ls_number_parameters      361 
_refine_ls_number_restraints      60 
_refine_ls_R_factor_all           0.1586 
_refine_ls_R_factor_gt            0.1385 
_refine_ls_wR_factor_ref          0.3109 
_refine_ls_wR_factor_gt           0.3005 
_refine_ls_goodness_of_fit_ref    1.054 
_refine_ls_restrained_S_all       1.076 
_refine_ls_shift/su_max           0.000 
_refine_ls_shift/su_mean          0.000 
 
loop_ 
 _atom_site_label 
 _atom_site_type_symbol 
 _atom_site_fract_x 
 _atom_site_fract_y 
 _atom_site_fract_z 
 _atom_site_U_iso_or_equiv 
 _atom_site_adp_type 
 _atom_site_occupancy 
 _atom_site_symmetry_multiplicity 
 _atom_site_calc_flag 
 _atom_site_refinement_flags 
 _atom_site_disorder_assembly 
 _atom_site_disorder_group 
Hg1A Hg 0.9420(3) 0.4568(2) 0.69856(5) 0.0297(4) Uani 1 1 d . . . 
Hg2A Hg 0.5068(3) 0.3373(2) 0.64183(5) 0.0287(4) Uani 1 1 d . . . 
Cl1A Cl 0.9978(18) 0.4025(16) 0.7710(3) 0.039(3) Uani 1 1 d . . . 
Cl2A Cl 0.2511(18) 0.1846(16) 0.6691(4) 0.041(3) Uani 1 1 d . . . 
F3A F 0.546(4) 0.488(4) 0.5497(8) 0.042(7) Uani 1 1 d . . . 
F4A F 0.830(5) 0.643(4) 0.5041(11) 0.053(8) Uani 1 1 d . . . 
F5A F 1.159(4) 0.719(4) 0.5459(10) 0.052(8) Uani 1 1 d . . . 
F6A F 1.201(4) 0.642(3) 0.6278(9) 0.040(7) Uani 1 1 d . . . 
O1A O 0.757(5) 0.141(4) 0.6912(11) 0.039(8) Uani 1 1 d . . . 
O2A O 0.857(5) -0.100(5) 0.6603(12) 0.047(9) Uani 1 1 d . . . 
C1A C 0.896(2) 0.5169(15) 0.6339(4) 0.037(8) Uani 1 1 d D . . 
C2A C 0.7276(18) 0.479(2) 0.6140(5) 0.037(8) Uani 1 1 d D . . 
C3A C 0.707(2) 0.521(3) 0.5707(5) 0.034(10) Uani 1 1 d D . . 
C4A C 0.854(3) 0.600(4) 0.5474(5) 0.052(14) Uani 1 1 d D . . 
C5A C 1.022(3) 0.638(4) 0.5673(6) 0.044(13) Uani 1 1 d D . . 
C6A C 1.0430(19) 0.596(3) 0.6105(6) 0.035(10) Uani 1 1 d D . . 
C7A C 0.947(8) -0.080(7) 0.7323(14) 0.042(12) Uani 1 1 d . . . 
H7AA H 0.9347 -0.0063 0.7572 0.063 Uiso 1 1 calc R . . 
H7AB H 1.0825 -0.0932 0.7242 0.063 Uiso 1 1 calc R . . 
H7AC H 0.8936 -0.1924 0.7398 0.063 Uiso 1 1 calc R . . 
C8A C 0.835(7) 0.004(6) 0.6927(17) 0.040(11) Uani 1 1 d . . . 
C9A C 0.783(2) -0.0436(13) 0.6209(5) 0.044(13) Uani 1 1 d D . . 
C10A C 0.594(2) -0.070(2) 0.6113(5) 0.064(18) Uani 1 1 d D . . 
H10A H 0.5122 -0.1282 0.6315 0.077 Uiso 1 1 calc R . . 
C11A C 0.525(2) -0.010(3) 0.5723(6) 0.056(15) Uani 1 1 d D . . 
H11A H 0.3951 -0.0282 0.5658 0.067 Uiso 1 1 calc R . . 
C12A C 0.644(3) 0.075(4) 0.5429(6) 0.056(16) Uani 1 1 d D . . 
H12A H 0.5965 0.1157 0.5162 0.068 Uiso 1 1 calc R . . 
C13A C 0.833(3) 0.101(4) 0.5525(7) 0.057(16) Uani 1 1 d D . . 
H13A H 0.9150 0.1596 0.5323 0.068 Uiso 1 1 calc R . . 
C14A C 0.903(2) 0.042(3) 0.5915(7) 0.06(2) Uani 1 1 d D . . 
H14A H 1.0321 0.0596 0.5980 0.075 Uiso 1 1 calc R . . 
Hg1B Hg 0.4324(3) 0.5176(2) 0.79646(5) 0.0312(4) Uani 1 1 d . . . 
Hg2B Hg -0.0155(3) 0.6257(2) 0.85643(5) 0.0300(4) Uani 1 1 d . . . 
Cl1B Cl 0.4988(19) 0.5851(16) 0.7239(3) 0.041(3) Uani 1 1 d . . . 
Cl2B Cl -0.2735(17) 0.7825(16) 0.8317(4) 0.039(3) Uani 1 1 d . . . 
F3B F 0.024(4) 0.456(4) 0.9476(9) 0.046(7) Uani 1 1 d . . . 
F4B F 0.310(4) 0.312(4) 0.9891(10) 0.056(9) Uani 1 1 d . . . 
F5B F 0.645(4) 0.243(4) 0.9452(9) 0.055(8) Uani 1 1 d . . . 
F6B F 0.687(4) 0.326(4) 0.8630(9) 0.043(7) Uani 1 1 d . . . 
O1B O 0.241(4) 0.830(4) 0.8072(9) 0.033(7) Uani 1 1 d . . . 
O2B O 0.323(7) 1.056(5) 0.8435(14) 0.064(12) Uani 1 1 d . . . 
C1B C 0.379(2) 0.4507(15) 0.8608(5) 0.040(5) Uani 1 1 d D . . 
C2B C 0.2075(18) 0.483(2) 0.8823(5) 0.040(5) Uani 1 1 d D . . 
C3B C 0.183(2) 0.434(3) 0.9252(5) 0.040(5) Uani 1 1 d D . . 
C4B C 0.329(3) 0.353(4) 0.9467(5) 0.040(5) Uani 1 1 d D . . 
C5B C 0.501(2) 0.320(4) 0.9252(7) 0.040(5) Uani 1 1 d D . . 
C6B C 0.5261(19) 0.369(3) 0.8823(7) 0.040(5) Uani 1 1 d D . . 
C7B C 0.425(8) 1.046(8) 0.7715(16) 0.051(15) Uani 1 1 d . . . 
H7BA H 0.4263 0.9776 0.7455 0.076 Uiso 1 1 calc R . . 
H7BB H 0.5560 1.0674 0.7797 0.076 Uiso 1 1 calc R . . 
H7BC H 0.3597 1.1548 0.7657 0.076 Uiso 1 1 calc R . . 
C8B C 0.327(8) 0.956(7) 0.8056(17) 0.048(5) Uani 1 1 d . . . 
C9B C 0.255(2) 0.9935(13) 0.8824(5) 0.048(5) Uani 1 1 d D . . 
C10B C 0.062(2) 1.015(2) 0.8919(5) 0.048(5) Uani 1 1 d D . . 
H10B H -0.0172 1.0729 0.8719 0.058 Uiso 1 1 calc R . . 
C11B C -0.0150(19) 0.952(3) 0.9307(6) 0.048(5) Uani 1 1 d D . . 
H11B H -0.1470 0.9672 0.9372 0.058 Uiso 1 1 calc R . . 
C12B C 0.101(3) 0.868(4) 0.9599(5) 0.048(5) Uani 1 1 d D . . 
H12B H 0.0478 0.8252 0.9865 0.058 Uiso 1 1 calc R . . 
C13B C 0.293(3) 0.846(4) 0.9504(7) 0.048(5) Uani 1 1 d D . . 
H13B H 0.3724 0.7887 0.9704 0.058 Uiso 1 1 calc R . . 
C14B C 0.3702(18) 0.909(3) 0.9116(7) 0.048(5) Uani 1 1 d D . . 
H14B H 0.5022 0.8944 0.9051 0.058 Uiso 1 1 calc R . . 
 
loop_ 
 _atom_site_aniso_label 
 _atom_site_aniso_U_11 
 _atom_site_aniso_U_22 
 _atom_site_aniso_U_33 
 _atom_site_aniso_U_23 
 _atom_site_aniso_U_13 
 _atom_site_aniso_U_12 
Hg1A 0.0384(10) 0.0310(9) 0.0200(8) -0.0026(6) -0.0027(6) -0.0017(7) 
Hg2A 0.0379(9) 0.0269(9) 0.0214(8) -0.0018(6) -0.0032(6) -0.0015(7) 
Cl1A 0.050(7) 0.050(7) 0.016(5) -0.004(5) -0.002(4) 0.003(5) 
Cl2A 0.045(7) 0.043(7) 0.035(6) -0.003(5) 0.002(5) -0.004(5) 
F3A 0.059(18) 0.046(17) 0.021(13) 0.009(12) -0.017(12) -0.004(13) 
F4A 0.06(2) 0.035(16) 0.06(2) 0.002(14) 0.010(16) -0.005(14) 
F5A 0.052(18) 0.06(2) 0.039(17) 0.019(15) 0.012(14) 0.005(15) 
F6A 0.040(16) 0.033(14) 0.048(17) 0.011(12) -0.014(13) 0.000(12) 
O1A 0.044(19) 0.031(18) 0.04(2) -0.011(15) 0.000(15) 0.004(15) 
O2A 0.05(2) 0.05(2) 0.04(2) -0.021(17) -0.015(17) -0.003(17) 
C1A 0.06(2) 0.024(16) 0.032(17) -0.004(13) -0.025(15) -0.015(14) 
C2A 0.06(2) 0.024(16) 0.032(17) -0.004(13) -0.025(15) -0.015(14) 
C3A 0.02(2) 0.03(2) 0.04(3) -0.02(2) -0.005(19) -0.008(18) 
C4A 0.07(4) 0.04(3) 0.04(3) -0.01(2) -0.02(3) 0.01(3) 
C5A 0.08(4) 0.02(2) 0.04(3) 0.015(19) -0.01(3) -0.01(2) 
C6A 0.04(3) 0.04(3) 0.03(2) -0.007(19) 0.01(2) 0.00(2) 
C7A 0.06(3) 0.05(3) 0.02(2) 0.00(2) -0.01(2) 0.00(2) 
C8A 0.03(3) 0.04(3) 0.05(3) 0.00(2) 0.00(2) 0.01(2) 
C9A 0.07(4) 0.04(3) 0.02(2) -0.01(2) 0.02(2) 0.00(2) 
C10A 0.06(4) 0.05(3) 0.09(5) -0.04(3) -0.01(3) 0.01(3) 
C11A 0.06(4) 0.06(4) 0.05(3) -0.01(3) -0.02(3) -0.01(3) 
C12A 0.06(4) 0.04(3) 0.07(4) 0.03(3) -0.02(3) -0.02(3) 
C13A 0.05(3) 0.07(4) 0.05(3) 0.02(3) 0.02(3) -0.01(3) 
C14A 0.15(6) 0.03(3) 0.01(2) 0.005(19) 0.00(3) -0.04(3) 
Hg1B 0.0384(10) 0.0321(9) 0.0233(8) -0.0035(7) -0.0016(7) 0.0015(7) 
Hg2B 0.0381(10) 0.0290(9) 0.0232(8) -0.0021(6) -0.0030(7) 0.0021(7) 
Cl1B 0.063(8) 0.044(7) 0.016(5) -0.010(5) 0.003(5) 0.002(6) 
Cl2B 0.037(6) 0.045(7) 0.037(6) -0.005(5) -0.005(5) 0.003(5) 
F3B 0.058(19) 0.051(18) 0.027(15) -0.005(13) 0.011(13) 0.008(14) 
F4B 0.055(19) 0.07(2) 0.041(17) 0.038(16) -0.014(14) 0.009(16) 
F5B 0.046(18) 0.08(2) 0.035(16) 0.024(16) -0.005(13) 0.015(16) 
F6B 0.035(15) 0.054(18) 0.040(16) 0.005(13) 0.000(12) 0.012(13) 
O1B 0.037(18) 0.038(18) 0.022(16) 0.005(13) 0.000(13) 0.000(14) 
O2B 0.09(3) 0.025(19) 0.07(3) 0.008(18) -0.01(2) -0.02(2) 
C1B 0.038(11) 0.038(11) 0.042(12) 0.003(9) -0.003(9) -0.001(8) 
C2B 0.038(11) 0.038(11) 0.042(12) 0.003(9) -0.003(9) -0.001(8) 
C3B 0.038(11) 0.038(11) 0.042(12) 0.003(9) -0.003(9) -0.001(8) 
C4B 0.038(11) 0.038(11) 0.042(12) 0.003(9) -0.003(9) -0.001(8) 
C5B 0.038(11) 0.038(11) 0.042(12) 0.003(9) -0.003(9) -0.001(8) 
C6B 0.038(11) 0.038(11) 0.042(12) 0.003(9) -0.003(9) -0.001(8) 
C7B 0.05(3) 0.07(4) 0.03(3) 0.01(3) 0.01(2) -0.03(3) 
C8B 0.056(12) 0.050(12) 0.040(11) -0.020(9) -0.018(9) 0.008(10) 
C9B 0.056(12) 0.050(12) 0.040(11) -0.020(9) -0.018(9) 0.008(10) 
C10B 0.056(12) 0.050(12) 0.040(11) -0.020(9) -0.018(9) 0.008(10) 
C11B 0.056(12) 0.050(12) 0.040(11) -0.020(9) -0.018(9) 0.008(10) 
C12B 0.056(12) 0.050(12) 0.040(11) -0.020(9) -0.018(9) 0.008(10) 
C13B 0.056(12) 0.050(12) 0.040(11) -0.020(9) -0.018(9) 0.008(10) 
C14B 0.056(12) 0.050(12) 0.040(11) -0.020(9) -0.018(9) 0.008(10) 
 
_geom_special_details 
; 
 All esds (except the esd in the dihedral angle between two l.s. planes) 
 are estimated using the full covariance matrix.  The cell esds are taken 
 into account individually in the estimation of esds in distances, angles 
 and torsion angles; correlations between esds in cell parameters are only 
 used when they are defined by crystal symmetry.  An approximate (isotropic) 
 treatment of cell esds is used for estimating esds involving l.s. planes. 
; 
 
loop_ 
 _geom_bond_atom_site_label_1 
 _geom_bond_atom_site_label_2 
 _geom_bond_distance 
 _geom_bond_site_symmetry_2 
 _geom_bond_publ_flag 
Hg1A C1A 2.088(13) . ? 
Hg1A Cl1A 2.325(11) . ? 
Hg2A C2A 2.074(12) . ? 
Hg2A Cl2A 2.296(12) . ? 
F3A C3A 1.35(3) . ? 
F4A C4A 1.39(4) . ? 
F5A C5A 1.31(3) . ? 
F6A C6A 1.30(3) . ? 
O1A C8A 1.20(6) . ? 
O2A C8A 1.32(6) . ? 
O2A C9A 1.40(4) . ? 
C1A C6A 1.39(2) . ? 
C1A C2A 1.39(2) . ? 
C2A C3A 1.39(2) . ? 
C3A C4A 1.39(2) . ? 
C4A C5A 1.39(2) . ? 
C5A C6A 1.39(2) . ? 
C7A C8A 1.61(6) . ? 
C7A H7AA 0.9800 . ? 
C7A H7AB 0.9800 . ? 
C7A H7AC 0.9800 . ? 
C9A C14A 1.39(2) . ? 
C9A C10A 1.39(2) . ? 
C10A C11A 1.39(2) . ? 
C10A H10A 0.9500 . ? 
C11A C12A 1.39(2) . ? 
C11A H11A 0.9500 . ? 
C12A C13A 1.39(2) . ? 
C12A H12A 0.9500 . ? 
C13A C14A 1.39(2) . ? 
C13A H13A 0.9500 . ? 
C14A H14A 0.9500 . ? 
Hg1B C1B 2.079(14) . ? 
Hg1B Cl1B 2.340(11) . ? 
Hg2B C2B 2.084(12) . ? 
Hg2B Cl2B 2.319(12) . ? 
F3B C3B 1.31(3) . ? 
F4B C4B 1.35(3) . ? 
F5B C5B 1.33(3) . ? 
F6B C6B 1.31(3) . ? 
O1B C8B 1.15(6) . ? 
O2B C9B 1.37(4) . ? 
O2B C8B 1.43(6) . ? 
C1B C6B 1.39(2) . ? 
C1B C2B 1.39(2) . ? 
C2B C3B 1.39(2) . ? 
C3B C4B 1.39(2) . ? 
C4B C5B 1.39(2) . ? 
C5B C6B 1.39(2) . ? 
C7B C8B 1.42(8) . ? 
C7B H7BA 0.9800 . ? 
C7B H7BB 0.9800 . ? 
C7B H7BC 0.9800 . ? 
C9B C10B 1.39(2) . ? 
C9B C14B 1.39(2) . ? 
C10B C11B 1.39(2) . ? 
C10B H10B 0.9500 . ? 
C11B C12B 1.39(2) . ? 
C11B H11B 0.9500 . ? 
C12B C13B 1.39(2) . ? 
C12B H12B 0.9500 . ? 
C13B C14B 1.39(2) . ? 
C13B H13B 0.9500 . ? 
C14B H14B 0.9500 . ? 
 
loop_ 
 _geom_angle_atom_site_label_1 
 _geom_angle_atom_site_label_2 
 _geom_angle_atom_site_label_3 
 _geom_angle 
 _geom_angle_site_symmetry_1 
 _geom_angle_site_symmetry_3 
 _geom_angle_publ_flag 
C1A Hg1A Cl1A 177.4(5) . . ? 
C2A Hg2A Cl2A 176.4(5) . . ? 
C8A O2A C9A 116(3) . . ? 
C6A C1A C2A 120.0(13) . . ? 
C6A C1A Hg1A 117.2(8) . . ? 
C2A C1A Hg1A 122.8(8) . . ? 
C3A C2A C1A 120.0(13) . . ? 
C3A C2A Hg2A 114.6(8) . . ? 
C1A C2A Hg2A 125.0(8) . . ? 
F3A C3A C4A 117.4(17) . . ? 
F3A C3A C2A 122.5(16) . . ? 
C4A C3A C2A 120.0(13) . . ? 
C3A C4A C5A 120.0(15) . . ? 
C3A C4A F4A 119.5(18) . . ? 
C5A C4A F4A 120.5(18) . . ? 
F5A C5A C4A 120.4(19) . . ? 
F5A C5A C6A 119.6(19) . . ? 
C4A C5A C6A 120.0(13) . . ? 
F6A C6A C1A 122.9(17) . . ? 
F6A C6A C5A 117.0(17) . . ? 
C1A C6A C5A 120.0(13) . . ? 
C8A C7A H7AA 109.5 . . ? 
C8A C7A H7AB 109.5 . . ? 
H7AA C7A H7AB 109.5 . . ? 
C8A C7A H7AC 109.5 . . ? 
H7AA C7A H7AC 109.5 . . ? 
H7AB C7A H7AC 109.5 . . ? 
O1A C8A O2A 125(5) . . ? 
O1A C8A C7A 127(5) . . ? 
O2A C8A C7A 107(4) . . ? 
C14A C9A C10A 120.0(13) . . ? 
C14A C9A O2A 118.6(19) . . ? 
C10A C9A O2A 121.4(19) . . ? 
C9A C10A C11A 120.0(13) . . ? 
C9A C10A H10A 120.0 . . ? 
C11A C10A H10A 120.0 . . ? 
C12A C11A C10A 120.0(15) . . ? 
C12A C11A H11A 120.0 . . ? 
C10A C11A H11A 120.0 . . ? 
C11A C12A C13A 120.0(13) . . ? 
C11A C12A H12A 120.0 . . ? 
C13A C12A H12A 120.0 . . ? 
C14A C13A C12A 120.0(13) . . ? 
C14A C13A H13A 120.0 . . ? 
C12A C13A H13A 120.0 . . ? 
C9A C14A C13A 120.0(15) . . ? 
C9A C14A H14A 120.0 . . ? 
C13A C14A H14A 120.0 . . ? 
C1B Hg1B Cl1B 178.1(5) . . ? 
C2B Hg2B Cl2B 176.5(5) . . ? 
C9B O2B C8B 122(4) . . ? 
C6B C1B C2B 120.0(15) . . ? 
C6B C1B Hg1B 116.6(8) . . ? 
C2B C1B Hg1B 123.4(8) . . ? 
C1B C2B C3B 120.0(13) . . ? 
C1B C2B Hg2B 124.5(8) . . ? 
C3B C2B Hg2B 115.2(8) . . ? 
F3B C3B C4B 116.0(18) . . ? 
F3B C3B C2B 124.0(18) . . ? 
C4B C3B C2B 120.0(13) . . ? 
F4B C4B C3B 120.3(19) . . ? 
F4B C4B C5B 119.6(18) . . ? 
C3B C4B C5B 120.0(15) . . ? 
F5B C5B C6B 118.8(19) . . ? 
F5B C5B C4B 121.2(19) . . ? 
C6B C5B C4B 120.0(13) . . ? 
F6B C6B C5B 117.2(17) . . ? 
F6B C6B C1B 122.6(17) . . ? 
C5B C6B C1B 120.0(13) . . ? 
C8B C7B H7BA 109.5 . . ? 
C8B C7B H7BB 109.5 . . ? 
H7BA C7B H7BB 109.5 . . ? 
C8B C7B H7BC 109.5 . . ? 
H7BA C7B H7BC 109.5 . . ? 
H7BB C7B H7BC 109.5 . . ? 
O1B C8B C7B 133(5) . . ? 
O1B C8B O2B 117(5) . . ? 
C7B C8B O2B 110(5) . . ? 
O2B C9B C10B 118(2) . . ? 
O2B C9B C14B 122(2) . . ? 
C10B C9B C14B 120.0(15) . . ? 
C11B C10B C9B 120.0(13) . . ? 
C11B C10B H10B 120.0 . . ? 
C9B C10B H10B 120.0 . . ? 
C10B C11B C12B 120.0(15) . . ? 
C10B C11B H11B 120.0 . . ? 
C12B C11B H11B 120.0 . . ? 
C13B C12B C11B 120.0(15) . . ? 
C13B C12B H12B 120.0 . . ? 
C11B C12B H12B 120.0 . . ? 
C14B C13B C12B 120.0(13) . . ? 
C14B C13B H13B 120.0 . . ? 
C12B C13B H13B 120.0 . . ? 
C13B C14B C9B 120.0(15) . . ? 
C13B C14B H14B 120.0 . . ? 
C9B C14B H14B 120.0 . . ? 
 
loop_ 
 _geom_torsion_atom_site_label_1 
 _geom_torsion_atom_site_label_2 
 _geom_torsion_atom_site_label_3 
 _geom_torsion_atom_site_label_4 
 _geom_torsion 
 _geom_torsion_site_symmetry_1 
 _geom_torsion_site_symmetry_2 
 _geom_torsion_site_symmetry_3 
 _geom_torsion_site_symmetry_4 
 _geom_torsion_publ_flag 
C6A C1A C2A C3A 0.00(3) . . . . ? 
Hg1A C1A C2A C3A -179.3(11) . . . . ? 
C6A C1A C2A Hg2A 172.5(15) . . . . ? 
Hg1A C1A C2A Hg2A -6.8(16) . . . . ? 
C1A C2A C3A C4A 0.00(3) . . . . ? 
Hg2A C2A C3A C4A -173.2(13) . . . . ? 
C2A C3A C4A C5A 0.00(7) . . . . ? 
C3A C4A C5A C6A 0.00(9) . . . . ? 
C2A C1A C6A C5A 0.00(7) . . . . ? 
Hg1A C1A C6A C5A 179.3(10) . . . . ? 
C4A C5A C6A C1A 0.00(9) . . . . ? 
C14A C9A C10A C11A 0.00(3) . . . . ? 
C9A C10A C11A C12A 0.00(3) . . . . ? 
C10A C11A C12A C13A 0.00(7) . . . . ? 
C11A C12A C13A C14A 0.00(9) . . . . ? 
C10A C9A C14A C13A 0.00(7) . . . . ? 
C12A C13A C14A C9A 0.00(9) . . . . ? 
C6B C1B C2B C3B 0.00(3) . . . . ? 
Hg1B C1B C2B C3B 179.8(11) . . . . ? 
C6B C1B C2B Hg2B 173.4(15) . . . . ? 
Hg1B C1B C2B Hg2B -6.8(17) . . . . ? 
C1B C2B C3B C4B 0.00(3) . . . . ? 
Hg2B C2B C3B C4B -174.0(14) . . . . ? 
C2B C3B C4B C5B 0.00(7) . . . . ? 
C3B C4B C5B C6B 0.00(9) . . . . ? 
C4B C5B C6B C1B 0.00(9) . . . . ? 
C2B C1B C6B C5B 0.00(7) . . . . ? 
Hg1B C1B C6B C5B -179.8(11) . . . . ? 
C14B C9B C10B C11B 0.00(3) . . . . ? 
C9B C10B C11B C12B 0.00(3) . . . . ? 
C10B C11B C12B C13B 0.00(7) . . . . ? 
C11B C12B C13B C14B 0.00(9) . . . . ? 
C12B C13B C14B C9B 0.00(9) . . . . ? 
C10B C9B C14B C13B 0.00(7) . . . . ? 
 
_diffrn_measured_fraction_theta_max    0.961 
_diffrn_reflns_theta_full              26.00 
_diffrn_measured_fraction_theta_full   0.961 
_refine_diff_density_max   12.033 
_refine_diff_density_min   -4.369 
_refine_diff_density_rms    0.707 

_publ_section_references 

; 
Bruker (2001). SAINTP+ for NT. Data Reduction and 
Correction Program v. 6.2, Bruker 
AXS, Madison, Wisconsin, USA. 

Bruker (2005). APEX2 software package. Bruker Molecular Analysis Research Tool, 
v. 1.27. Bruker AXS, Madison, Wisconsin, USA. 

Sheldrick G.M. (2003). SADABS v.2.03, Bruker/Siemens Area Detector 
Absorption Correction Program, Bruker AXS, Madison, Wisconsin, USA. 

Sheldrick G.M. (2001). SHELXTL NT v. 6.12, Structure Determination Software 
Suite, Bruker AXS, Madison, Wisconsin, USA. 
;
